# 1 Structures of the stator complex that drives rotation of the bacterial flagellum

2

3 **Justin C. Deme<sup>1,2</sup>, Steven Johnson<sup>1</sup>, Owen Vickery<sup>3,4</sup>, Amy Muellbauer<sup>1</sup>, Holly Monkhouse<sup>1</sup>,**  
4 **Thomas Griffiths<sup>1</sup>, Rory Hennell James<sup>1</sup>, Ben C. Berks<sup>3</sup>, James W. Coulton<sup>5,6</sup>, Phillip J.**  
5 **Stansfeld<sup>3,4</sup> & Susan M. Lea<sup>1,2,\*</sup>**

6

7 1. Sir William Dunn School of Pathology, University of Oxford, South Parks Road, Oxford OX1  
8 3RE, UK

9 2. Central Oxford Structural Molecular Imaging Centre, University of Oxford, South Parks Road,  
10 Oxford, OX1 3RE, UK

11 3. Department of Biochemistry, University of Oxford, South Parks Road, Oxford OX1 3QU

12 4. School of Life Sciences & Department of Chemistry, University of Warwick, Coventry, CV4 7AL,  
13 UK.

14 5. Department of Microbiology and Immunology, McGill University, 3775 University Street,  
15 Montreal, H3A 2B4, Canada

16 6. Département de biochimie et médecine moléculaire, Université de Montréal, 2900  
17 boulevard Édouard-Montpetit, Montréal, H3T 1J4, Canada

18 \*For Correspondence: [susan.lea@path.ox.ac.uk](mailto:susan.lea@path.ox.ac.uk)

19

20

## 21 Summary

22 The bacterial flagellum is the proto-typical protein nanomachine and comprises a  
23 rotating helical propeller attached to a membrane-embedded motor complex<sup>1</sup>. The motor  
24 consists of a central rotor surround by stator units that couple ion flow across the cytoplasmic  
25 membrane to torque generation. Here we present the structures of stator complexes from  
26 multiple bacterial species, allowing interpretation of the extensive body of data on stator  
27 mechanism. The structures reveal an unexpected asymmetric A<sub>5</sub>B<sub>2</sub> subunit assembly in which  
28 the five A subunits enclose the two B subunits. Comparison to novel structures of other ion-  
29 driven motors indicates that this A<sub>5</sub>B<sub>2</sub> architecture is fundamental to bacterial systems that

30 couple energy from ion-flow to generate mechanical work at a distance, and suggests that  
31 such events involve rotation in the motor structures.

32

### 33 **Main**

34 A motor is a machine that supplies motive power for a device with moving parts.  
35 Biological systems use both linear and rotary motors to generate a variety of outputs. One of  
36 the most fascinating and complex biological rotary motors is the flagellar apparatus used by  
37 bacteria to propel themselves through fluid environments. Although bacterial swimming was  
38 first observed in the 17<sup>th</sup> century<sup>2</sup>, a mechanistic understanding of how the bacterial flagellum  
39 generates rotation is still lacking. The core of the flagellum is a highly conserved motor (Fig.  
40 1a) consisting of a cytoplasmic-membrane embedded rotor complex surrounded by varying  
41 numbers of stator complexes (hereafter termed simply stators) that generate torque<sup>3</sup>. While  
42 high resolution information has recently been obtained for the rotor component<sup>4</sup>, structural  
43 detail of the stators has thus far been limited to modelling studies<sup>5</sup>.

44 Stators harvest energy from either H<sup>+</sup> or Na<sup>+</sup> ion flow across the cytoplasmic  
45 membrane, generating torque in the cytoplasmic portion (C-ring) of the rotor complex<sup>6-9</sup>.  
46 Chimeras between H<sup>+</sup>- and Na<sup>+</sup>-dependent stators are functional, implying that the  
47 mechanism converting ion flow into work is the same for the two coupling ions<sup>10</sup>. Stators are  
48 built from two cytoplasmic membrane proteins, which for simplicity are generically referred  
49 to here as MotA and MotB. MotA is predicted to contain four transmembrane helices (TMH)  
50 with a large cytoplasmic insertion between TMH2 and TMH3. MotB is predicted to contain a  
51 short cytoplasmic sequence, a single TMH, and a C-terminal peptidoglycan binding (PGB)  
52 domain. Early biochemical work defined the stator stoichiometry as MotA<sub>4</sub>B<sub>2</sub><sup>11</sup>, and this  
53 subunit composition has informed attempts to derive mechanism for conversion of ion flow

54 into rotation (reviewed in <sup>12</sup>). Extensive experimental studies have led to a model of stator  
55 function in which docking of the MotA cytoplasmic loop to the rotor C-ring simultaneously  
56 induces ion permeation through the stator and release of the MotB-PGB domain to bind to  
57 the peptidoglycan (PG) surrounding the flagellar basal body<sup>13,14</sup>. Ion flow is proposed to lead  
58 to conformational changes in the cytoplasmic domain of MotA that generate torque in the  
59 rotor<sup>15-17</sup>. In the absence of a stator structure various mechanistic hypotheses have been  
60 proposed to explain the coupling of ion flow to conformational change, most of which  
61 explicitly use the predicted 2-fold symmetry of a MotA<sub>4</sub>B<sub>2</sub> complex<sup>17-19</sup>.

62

### 63 **Flagellar stators are MotA<sub>5</sub>B<sub>2</sub> complexes**

64 We used cryo-electron microscopy (cryo-EM) to study stator complexes from a range  
65 of bacterial species with different ion specificities (Extended Data Fig. 1). Two-dimensional  
66 class averages of the complexes from three species (*Vibrio mimicus*, *Clostridium sporogenes*  
67 and *Bacillus subtilis*) clearly showed a distorted, pentagonal, structure (Fig. 1b). 3D  
68 reconstructions of these complexes yielded volumes that could only be interpreted as  
69 MotA<sub>5</sub>B<sub>2</sub> assemblies (Fig. 1c; Extended Data Fig. 2), with five copies of MotA fully enclosing  
70 the TMHs of two copies of MotB (Fig. 2a). Although we do not observe the PGB-domains of  
71 MotB in the resolved structures, these domains must be present in the imaged complexes  
72 because the stators were purified using an affinity tag located after the PGB domain. Thus,  
73 the PGB-domain of MotB has no fixed location with respect to the core complex in the context  
74 of the isolated protein. The stator structures are compatible with sequence conservation  
75 data, with inter- and intra-molecular co-evolution data, and with published cysteine  
76 crosslinking<sup>20,21</sup> and tryptophan scanning mutagenesis<sup>22,23</sup> (Extended data Fig. 3).

77           The four TMHs of MotA are arranged in two layers. TMH3 and TMH4 line the central  
78   pore, while TMH1 and TMH2 form a surrounding outer layer of helices (Fig. 2a,b). TMH1 and  
79   TMH2 are not in contact with each other within a single subunit but instead interact between  
80   adjacent subunits, thereby stabilising the MotA assembly. Immediately following TMH2 there  
81   is an amphipathic helix (AMPH) running perpendicular to the TMHs at the cytoplasmic  
82   membrane surface, with the five copies of this helix forming a belt around the outside of the  
83   structure. TMH3 and TMH4 extend 30 Å outside the membrane to form the core of the MotA  
84   cytoplasmic domain, with the rest of the domain built from helices inserted in the loop  
85   between the AMPH and TMH3. Both within and outside the membrane domain the  
86   pentameric arrangement of MotA is distorted (Fig. 2c). Charged residues shown to be  
87   essential for the interaction of the stator with the rotor C-ring<sup>24</sup> are located towards the base  
88   of this domain, forming a ring that decorates the surface of the pentamer (Extended data Fig.  
89   4).

90           The TMHs of the two copies of MotB are located in the central pore of the distorted  
91   MotA pentamer, with their hydrophobic sidechains completely buried within the MotA ring.  
92   From the N-terminal ends of the MotB TMHs clear densities extend down to contact the inner  
93   surfaces of TMH3 and TMH4 in the cytoplasmic domains of MotA (Fig. 3a,b; Extended Data  
94   Fig. 5a,b). Although the densities are too weak for the sequence to be traced, they are of  
95   sufficient length to account for most of the MotB N-terminus, including a cluster of positive  
96   charges essential for motor function<sup>25</sup>. At the non-cytoplasmic face of the complex the MotB  
97   TMHs emerge vertically from the MotA pentamer and are followed by another short helical  
98   section that packs down between the TMH3-TMH4 loops of the MotA chains. The connectivity  
99   of these densities defines them as the plug helices previously implicated by mutagenesis as  
100   critical to sealing the complexes in an off state<sup>26</sup>.



101 Prior mutagenesis studies have established that a series of conserved residues in the  
102 TMHs of MotA and MotB are important for flagellar motion and/or ion-flow through the  
103 stator (reviewed in <sup>3</sup>). Invariant MotB<sub>D32</sub> (using the *Escherichia coli* numbering system) is the  
104 key protonatable residue and both copies are seen to lie within a ring formed by the five  
105 copies of another invariant polar residue, MotA<sub>T209</sub> (Fig. 3c). A second Thr residue (at a  
106 position corresponding to residue A180 in *E. coli* MotA) that is conserved in the Na<sup>+</sup>-  
107 dependent stators also contributes to this ring, and forms part of a track of Na<sup>+</sup>/H<sup>+</sup> specificity  
108 determining residues that line the inner surface of the MotA pore (Extended data Fig. 1b).  
109 Two conserved Pro residues in MotA have been shown to be important for torque  
110 generation<sup>27</sup>. One of these, MotA<sub>P222</sub> can now be seen to be required for contacts between  
111 neighbouring MotA monomers. The other, MotA<sub>P173</sub>, forms a second ring of conserved  
112 residues with invariant MotA<sub>Y217</sub>, two helical turns down from the Thr ring. This hydrophobic  
113 ring contacts MotB at the completely conserved MotB<sub>W26</sub>. A MotB<sub>W26A</sub> substitution  
114 completely abolished motility confirming the importance of this contact (Fig. 3d).

115

### 116 **Asymmetry and the implications for activation of ion flow**

117 The 5:2 stoichiometry of the stator complex leads to multiple levels of asymmetry in  
118 the structure (Fig. 2c; Extended Data Fig. 5c). The pentagon formed by the MotA subunits  
119 within the membrane is distorted to accommodate and seal around the two MotB TMHs. The  
120 asymmetry of this part of the complex is also driven by the two MotB plug helices sitting  
121 between the MotA loops, which divide the MotA chains into two groups separated in the  
122 extracytoplasmic region. Removal of the MotB plug has been shown to lead to uncontrolled  
123 ion flow through the MotAB channel<sup>26</sup>. However, our structures show that the plug helices  
124 are not the sole block to ion permeation since there are no detectable channels across the

125 cytoplasmic membrane compartment (Fig. 3e; Extended Data Fig. 5d). Embedding plug-free  
126 structures in full lipid bilayer models and running extended simulations demonstrated the  
127 observed structures are stable, low energy, states (Extended Data Fig. 6). No ion permeation  
128 across the bilayer was seen in any simulation, supporting the idea that the complexes  
129 currently seen will require rearrangement for activity.

130         Activation of ion flow is proposed to be triggered by docking of the inactive stator onto  
131 the flagellar C-ring via the MotA cytoplasmic domains resulting in signal propagation from the  
132 cytoplasm to the plug region and plug release<sup>13,14</sup>. Our structures reveal two potential routes  
133 for such a signal. The first involves the cytoplasmic N-termini of the MotB subunits which  
134 contain functionally essential residues<sup>25</sup> that interact with the inside of the MotA pentamer  
135 through highly evolutionarily coupled contacts (Extended data Fig. 3d). C-ring-induced  
136 movement of MotA would be communicated to MotB at this site leading to alterations at the  
137 opposite end of the MotB TMHs. The second possible route of signal propagation is directly  
138 through the MotA subunits, with hinging of the long TMH3 and TMH4 helices altering the  
139 conformation of the plug helix binding loops to allow plug release. Our structures provide  
140 insight into the conformational changes that the MotA cytoplasmic domains can undergo. The  
141 structures show differing degrees of hinging of the MotA cytoplasmic domains relative to the  
142 membrane embedded helices (Fig. 3f; Extended Data Fig. 5e) suggesting changes in the  
143 degree of asymmetry may link to functional state. Our structures also reveal that the two  
144 MotA residues known to be essential for interaction with the C-ring protein FliG<sup>24</sup> are located  
145 on opposite sides of the MotA cytoplasmic domain, with MotA<sub>R90</sub> from one copy facing  
146 MotA<sub>E98</sub> from the neighbouring copy (Extended data Fig. 4). Therefore docking of the C-  
147 terminal domain of FliG between two MotA subunits could trigger conformational change in  
148 the stator.

149

## 150 **Coupling of ion-flow to flagellar rotation**

151           The most striking feature of the asymmetry of the 5:2 subunit stoichiometry is that it  
152 places the TMHs of the two copies of MotB, including the critical MotB<sub>D32</sub> residue, in different  
153 environments within the distorted MotA pentagon. The system is therefore primed for  
154 differential binding of H<sup>+</sup> or Na<sup>+</sup> at the critical MotB<sub>D32</sub> residue to induce changes in the  
155 relative positioning of the MotB and MotA helices, most likely by rotation of one relative to  
156 the other. Because MotB becomes tethered to the PG upon stator activation<sup>13</sup> (Fig. 4a) it  
157 follows that the MotA ring rotates around the MotB dimer. The 5:2 subunit stoichiometry  
158 implies a model whereby a single channel opens to allow ion binding to MotB<sub>D32</sub> on one MotB  
159 triggering rotation of the MotA ring by ~36° (Fig. 4b). This motion would bring the second  
160 MotB chain into the same position relative to the surrounding MotA subunits as the starting  
161 arrangement of the first MotB chain, closing the first channel and opening the second. Each  
162 subsequent ion binding event would trigger a further ratchet motion of 36°, with each turn  
163 of the MotA cytoplasmic domains providing a “power stroke” to the rotor. An alternative  
164 model in which the second ion binding event leads to a reset to the original position and full  
165 rotation does not occur, would also be compatible with the structure. Such a mechanism  
166 would still be capable of driving full rotation of the rotor component, acting like an energised  
167 escapement mechanism.

168           Any mechanism for coupling ion flow to flagellar rotation must also explain how the  
169 direction of rotation of the flagellum can reverse in response to chemotactic stimuli. All  
170 experimental evidence (reviewed in <sup>28</sup>) shows that the chemotaxis machinery acts on the FlgG  
171 subunit of the C-ring rather than the stator. Our unidirectional rotation model for the stator  
172 mechanism can account for flagellar reversal if the chemotaxis-linked conformational

173 changes induced in the C-ring lead to an alteration in the side of the stator that is driving the  
174 rotation (Fig. 4c). Consistent with this proposal large conformational changes in the stator-  
175 interacting FliG component of the C-ring have been observed in crystal structures of FliG  
176 fragments, where 180° rotations of the C-terminal domain relative to the middle domain have  
177 been observed<sup>29</sup>. The model also predicts that any reversal of the ion flow through the stator  
178 would have the potential to reverse the direction of flagellar rotation even in the absence of  
179 switching by the chemotaxis machinery, and this phenomenon has been observed in  
180 *Streptococcus* species assayed under high pH conditions<sup>30,31</sup>.

181

## 182 **Common architecture across multiple bacterial ion-driven machines**

183 The MotAB system is related at the sequence level to the ExbBD complex found in  
184 Gram-negative bacteria that uses ion-flow across the cytoplasmic membrane to power  
185 transport processes at the outer membrane via the trans-periplasmic TonB protein<sup>32</sup>. We  
186 determined cryo-EM structures of ExbBD complexes from *E. coli* and *Pseudomonas savastanoi*  
187 (Extended Data Fig. 7). Both displayed a 5:2 ExbB:ExbD stoichiometry that differs from the  
188 subunit composition of earlier structures<sup>33,34</sup>, but agrees with the subunit stoichiometry of a  
189 novel structure of the *E. coli* ExbBD reported whilst this manuscript was in preparation<sup>35</sup>.  
190 Comparison of these new ExbB<sub>5</sub>D<sub>2</sub> structures to the stator complexes reveals a high level of  
191 structural conservation, particularly within the membrane domain (Extended Data Fig. 8a,b).  
192 Both the flattened pentagon geometry and the alignment of mechanistically important  
193 residues, such as the conserved Asp within a ring of Thr residues, suggest that the two systems  
194 use the same molecular mechanism. We therefore predict that the ExbB will rotate relative  
195 to the ExbD helices in response to proton flow. Outside the core TMH region there are  
196 structural differences between the systems that presumably reflect their very different

197 biologies. ExbB is very differently elaborated relative to MotA, with only one TMH packing  
198 across the pair of helices that form the core inner ring and no bracing helices strengthening  
199 packing between subunits (Extended Data Fig. 8c). The ExbB cytoplasmic domains are only  
200 superficially related to the corresponding MotA domain and lack the short pair of C-terminal  
201 helices found in MotA (Extended Data Fig. 8d).

202 *P. savastanoi* ExbB and ExbD were purified as a complex with TonB when all three  
203 proteins were co-expressed (Extended data Fig. 9a). However, no extra density was observed  
204 in the cryo-EM maps of this complex relative to the ExbBD complex alone, suggesting that  
205 TonB is located on the outside of the ExbBD complex and dissociates upon sample freezing. A  
206 peripheral location for TonB is consistent with both co-evolution and  
207 mutagenesis/suppressor data<sup>36</sup>, which suggest that the TonB binding site is on the outside of  
208 the ExbB transmembrane domain (Extended data Fig. 9b). TonB consists of a single pass TMH,  
209 followed by an extended periplasmic region that interacts with the periplasmic domain of  
210 ExbD<sup>37</sup>, and terminates in a folded domain that links with outer-membrane receptor  
211 proteins<sup>38</sup>. We speculate that the TonB TMH packs against the exterior of the ExbBD complex  
212 so that conformational change in TonB is driven by rotation of the ExbB component relative  
213 to ExbD. By extension, the homologous TolQRA system will also share this architecture and  
214 be mechanistically related<sup>39</sup>.

215 Bacteria from the *Bacteroidetes* phylum possess a motor complex that harvests  
216 energy from ion-flow to drive protein secretion and to power bacterial motility via a non-  
217 flagellar mechanism termed gliding motility<sup>40</sup>. The structure of this complex is described in a  
218 companion paper (Hennell-James et al, companion paper). Although the constituent GldL  
219 and GldM subunits of this motor have no sequence similarity to the subunits of the MotAB or  
220 ExbBD complexes, the *Bacteroidetes* motor complex exhibits the same 5:2 subunit

221 stoichiometry as these complexes (Fig. 5a). All three complexes have an intramembrane core  
222 consisting of a central subunit TMH dimer surrounded by a 10 TMH ring. Structural  
223 comparisons demonstrate the similarity between the three motors in the arrangement of this  
224 intramembrane core and of the height within the membrane at which charged residues  
225 critical to function are located (Fig. 5b,c). Such shared underlying architecture between  
226 otherwise highly dissimilar motors (Fig. 5d) implies an unexpected commonality in their  
227 mechanism.

228

### 229 **Acknowledgements**

230 We thank David Blair for providing *E. coli* RP6894. We thank E. Johnson and A. Costin of the  
231 Central Oxford Structural Molecular Imaging Centre (COSMIC) for assistance with data  
232 collection, and H. Elmlund (Monash) for access to SIMPLE code ahead of release. We  
233 acknowledge the use of the Central Oxford Structural Microscopy and Imaging Centre  
234 (COSMIC). The Central Oxford Structural Microscopy and Imaging Centre is supported by the  
235 Wellcome Trust (grant no. 201536), The EPA Cephalosporin Trust, The Wolfson Foundation  
236 and a Royal Society/Wolfson Foundation Laboratory Refurbishment Grant (no. WL160052).  
237 Research in S.M.L.'s laboratory is supported by a Wellcome Trust Investigator Award (grant  
238 no. 100298), a Collaborative award (no. 209194) and an Medical Research Council (London)  
239 Programme Grant (no. MR/M011984/1). Research in B.C.B.'s laboratory is supported by a  
240 Wellcome Trust Investigator Award (grant no. 107929/Z/15/Z). Research in J.W.C.'s  
241 laboratory is supported by the Canadian Institutes of Health Research (grant 178048-BMA-  
242 CFAA-11449). Research in P.J.S.'s lab is funded by Wellcome (208361/Z/17/Z), the MRC  
243 (MR/S009213/1) and BBSRC (BB/P01948X/1, BB/R002517/1 and BB/S003339/1). This project  
244 made use of time on ARCHER and JADE granted via the UK High-End Computing Consortium

245 for Biomolecular Simulation, HECBioSim (<http://hecbiosim.ac.uk>), supported by EPSRC (grant  
246 no. EP/R029407/1), and Athena at HPC Midlands+, which was funded by the EPSRC on grant  
247 EP/P020232/1, and used the University of Warwick Scientific Computing Research  
248 Technology Platform for computational access.

249

#### 250 **Author contributions**

251 J.C.D carried out all biochemical work except as credited otherwise, prepared cryo-EM grids,  
252 collected and processed EM data and determined the structures. J.C.D., S.J., and S.M.L  
253 designed the project, interpreted the data, built models, and wrote the first draft of the  
254 paper. S.J. also performed MALS experiments. O.V. and P.J.S. performed molecular dynamics  
255 simulations. A.M., H.M., and T.G. carried out biochemical work on *Pseudomonas* TonB-ExbB-  
256 ExbD. R.H.J. and B.C.B. contributed the GldLM structure. J.W.C. initiated and provided  
257 materials for the ExbBD project. All authors commented on drafts of the manuscript.

258

259

260

261



262 **Figures**

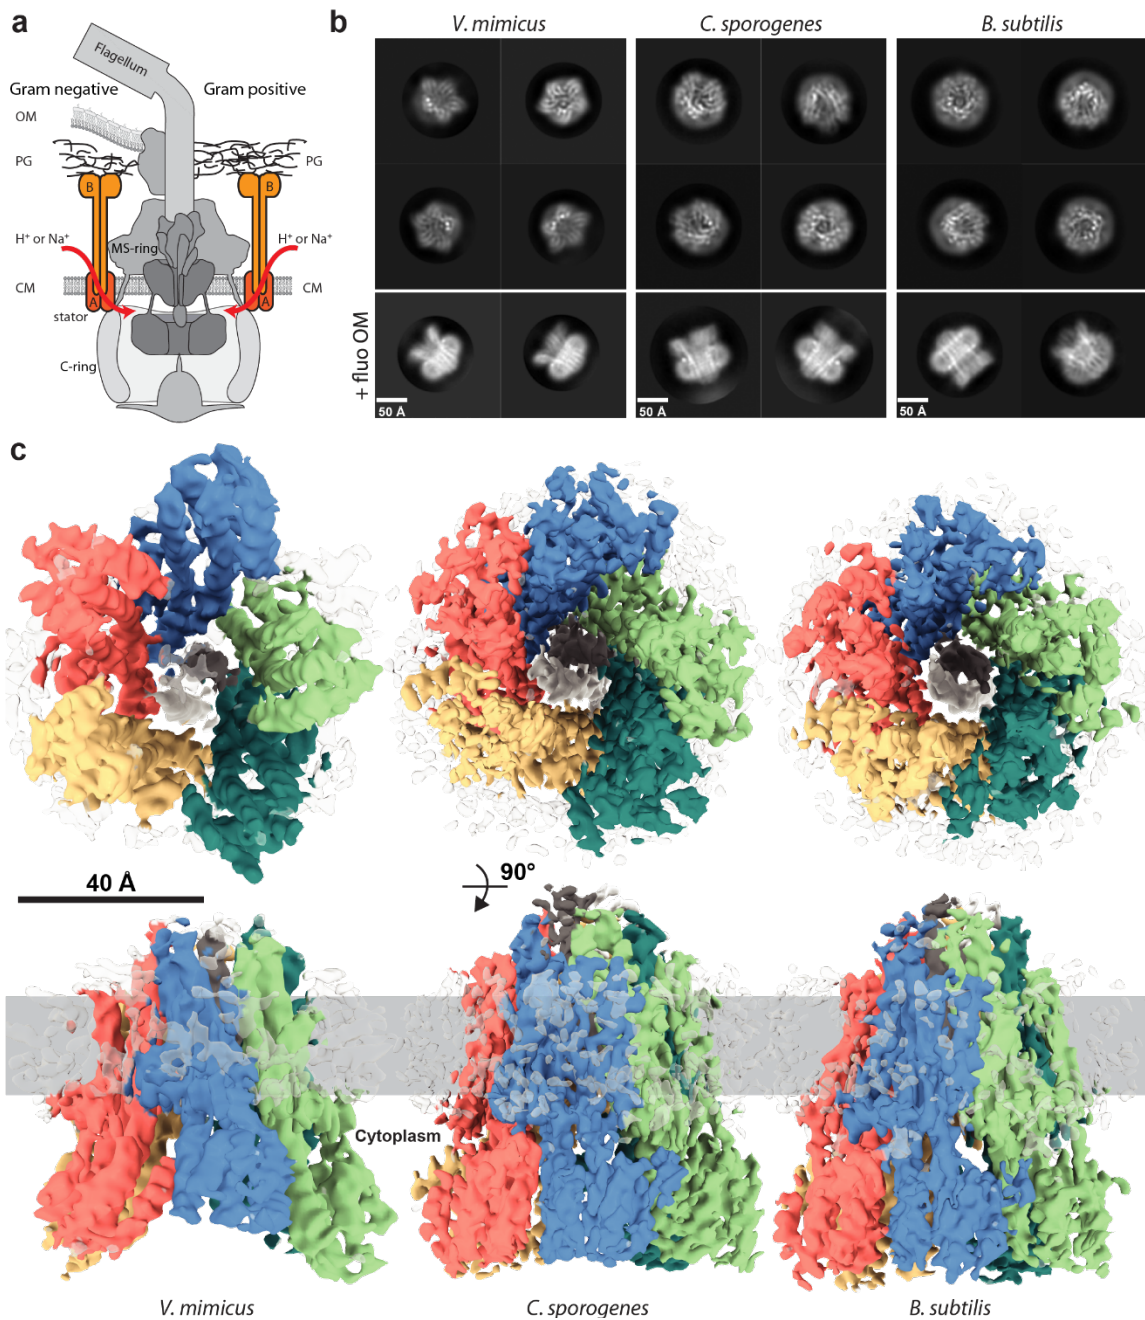

263  
264

265 **Figure 1. Stators from multiple organisms have a MotA<sub>5</sub>MotB<sub>2</sub> stoichiometry.** **a**, Composite  
 266 cartoon showing the general organisation of bacterial flagellar complexes in Gram-negative  
 267 (left side) and Gram-positive (right side) bacteria with major components labelled. Stators are  
 268 orange and rotor components, MS- and C-ring, are grey. OM, outer membrane; CM,  
 269 cytoplasmic membrane; PG, peptidoglycan. **b**, 2D class averages of cryo-EM particles of  
 270 stators from the bacterial species indicated. Upper panels are representative 'top' views of  
 271 the 5:2 complexes. Lower panels are 'side' views from data collected in the presence of  
 272 fluorinated octyl maltoside. **c**, Cryo-EM volumes of stators from the three bacterial species.  
 273 The MotA subunits are coloured pink, blue, green, teal, and yellow, and the centrally-located  
 274 MotB subunits white and dark grey. Bound detergent is shown as transparent density at the



275 periphery. Upper panels show views from the cytoplasm, lower panels show side views with  
276 the likely membrane location (assigned from the position of the detergent micelle and from  
277 simulations; Extended Data Fig. 6) indicated by the grey bar.  
278

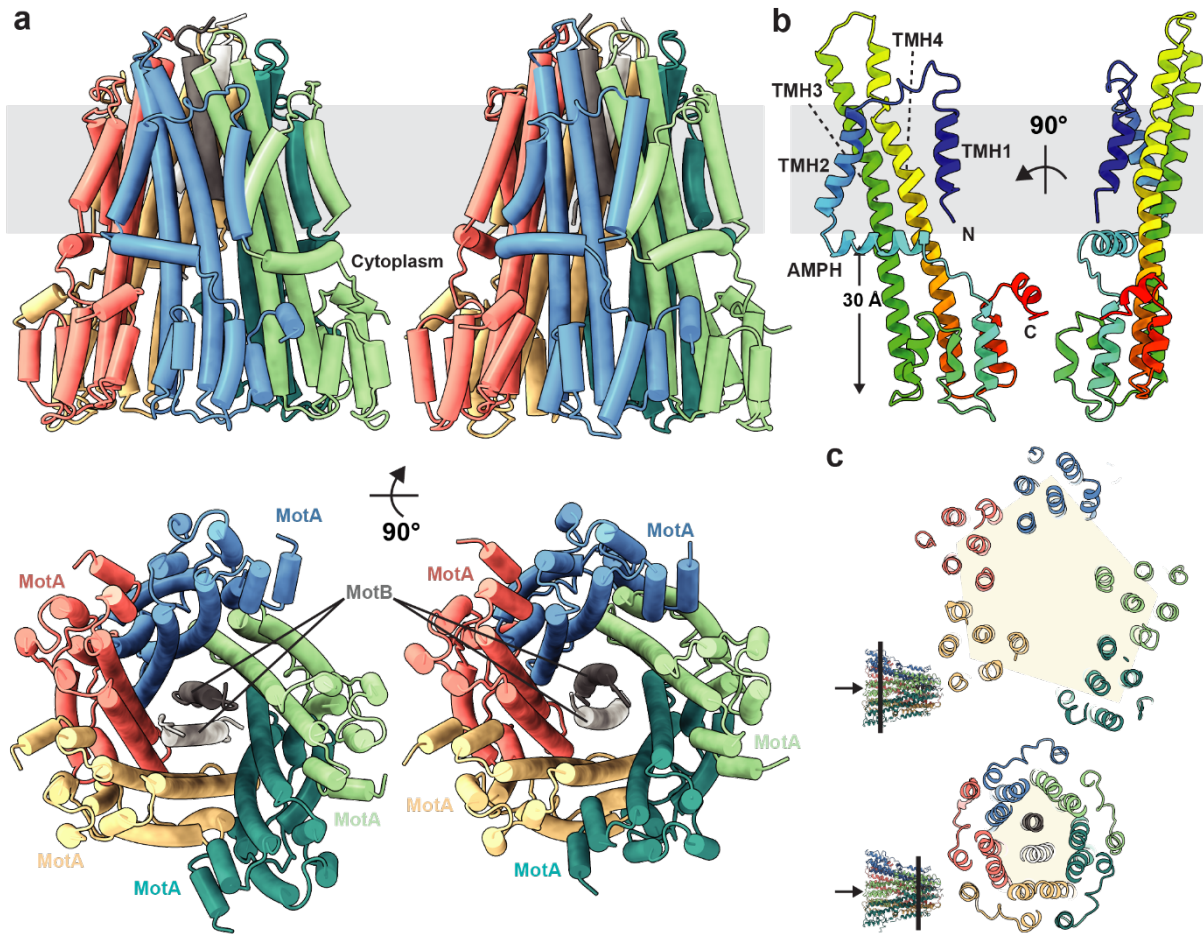

279  
280

281 **Figure 2. Structures of stators from *C. sporogenes* and *B. subtilis*.** a, The *C. sporogenes* (left)  
282 and *B. subtilis* (right) stators are shown as cartoon representations and coloured as in Fig. 1c.  
283 Upper panel, side view with membrane indicated in grey. Lower panel, view from the  
284 cytoplasm. b, Two views of a single MotA subunit (*C. sporogenes*) coloured from blue at the  
285 N-terminus to red at the C-terminus. c, Slabs (viewed from cytoplasm) through the *C.*  
286 *sporogenes* complex at the indicated positions on the inset structure (arrow indicates the  
287 cytoplasmic side of the complex). Distortion of the MotA subunits from a regular pentagon  
288 arrangement becomes more extreme in the cytoplasmic regions.

289

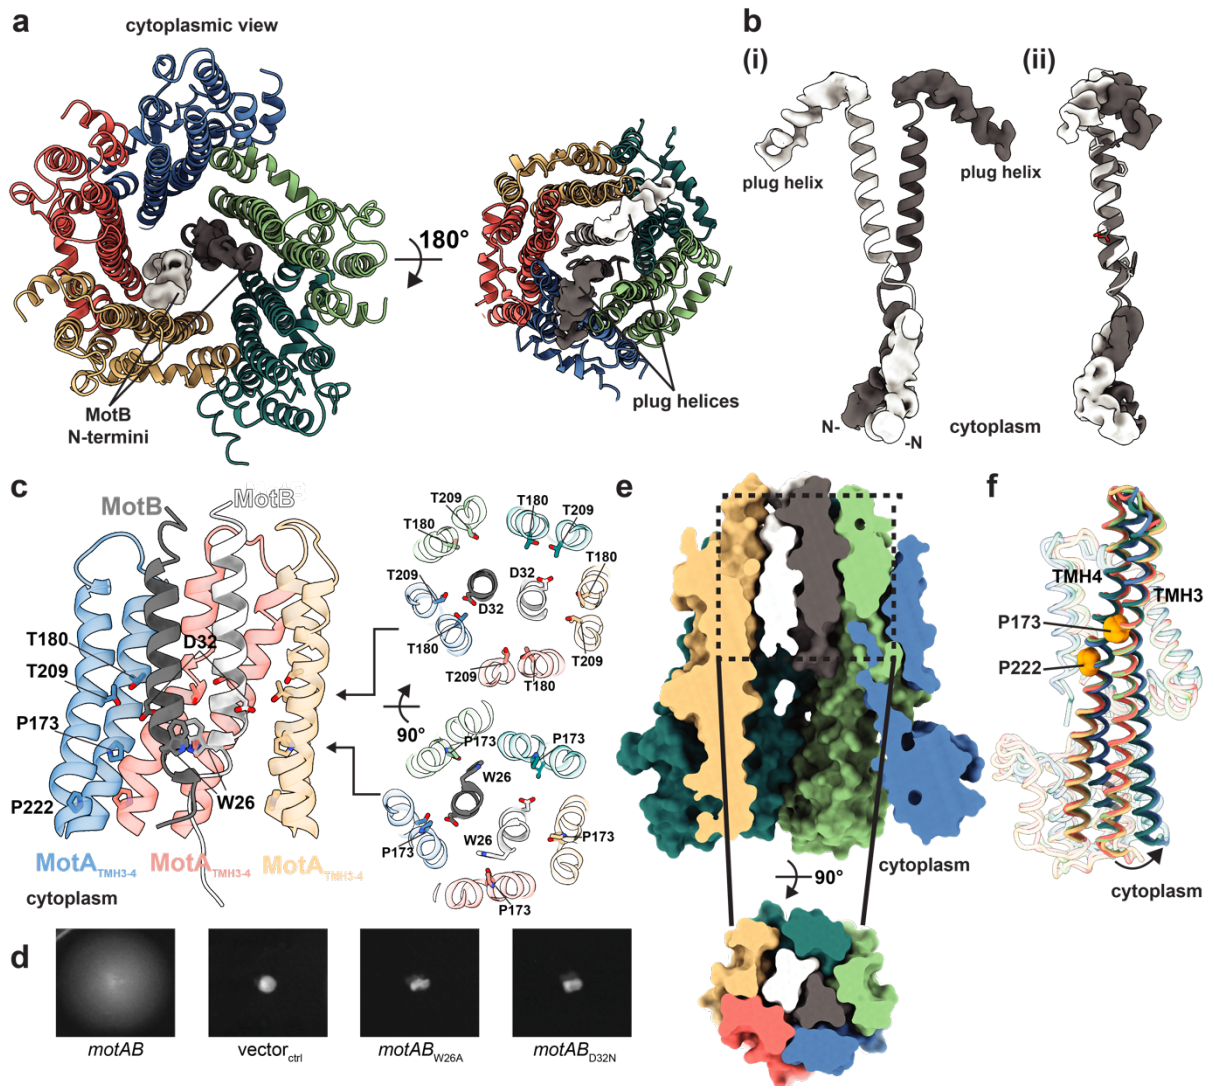

290

291 **Figure 3. Functionally critical regions of the stator complex.** **a**, Structure of the *C. sporogenes*  
 292 stator shown as cartoon representations coloured as in Figs. 1 and 2 with the unmodeled  
 293 density for the MotB N-terminal extensions (Left) and plug helices (Right) shown. **b**, (i)  
 294 Isolated MotB dimer extracted from the *C. sporogenes* stator and (ii) superposition of the  
 295 TMHs of the two MotB chains showing the relative rotation of the N-terminal extensions and  
 296 plug helices. **c**, The environment around MotB<sub>Dp32</sub> within the membrane. (Left) Only the core  
 297 MotA helices within the transmembrane region are shown and the two copies of MotA at the  
 298 front of the view are removed. (Right) Slabs through the stator core at the indicated heights.  
 299 Residue numbering is that of the *E. coli* MotAB stator but displayed on the *C. sporogenes*  
 300 stator structure. **d**, Motility in soft agar of *E. coli* RP6894 ( $\Delta$ *motAB*) complemented with  
 301 plasmids expressing *motAB* with the indicated mutations or the vector control (vector<sub>ctrl</sub>). **e**,  
 302 Surface representation of the model shows close packing. (Top) Side view with front of  
 303 complex removed. (Bottom) Top-down view of the slab indicated by dashed lines. **f**, Overlay  
 304 of the five copies of the *C. sporogenes* MotA chain reveals they fall into two conformational  
 305 classes which differ in the degree of flexing at the highlighted prolines.

306

307

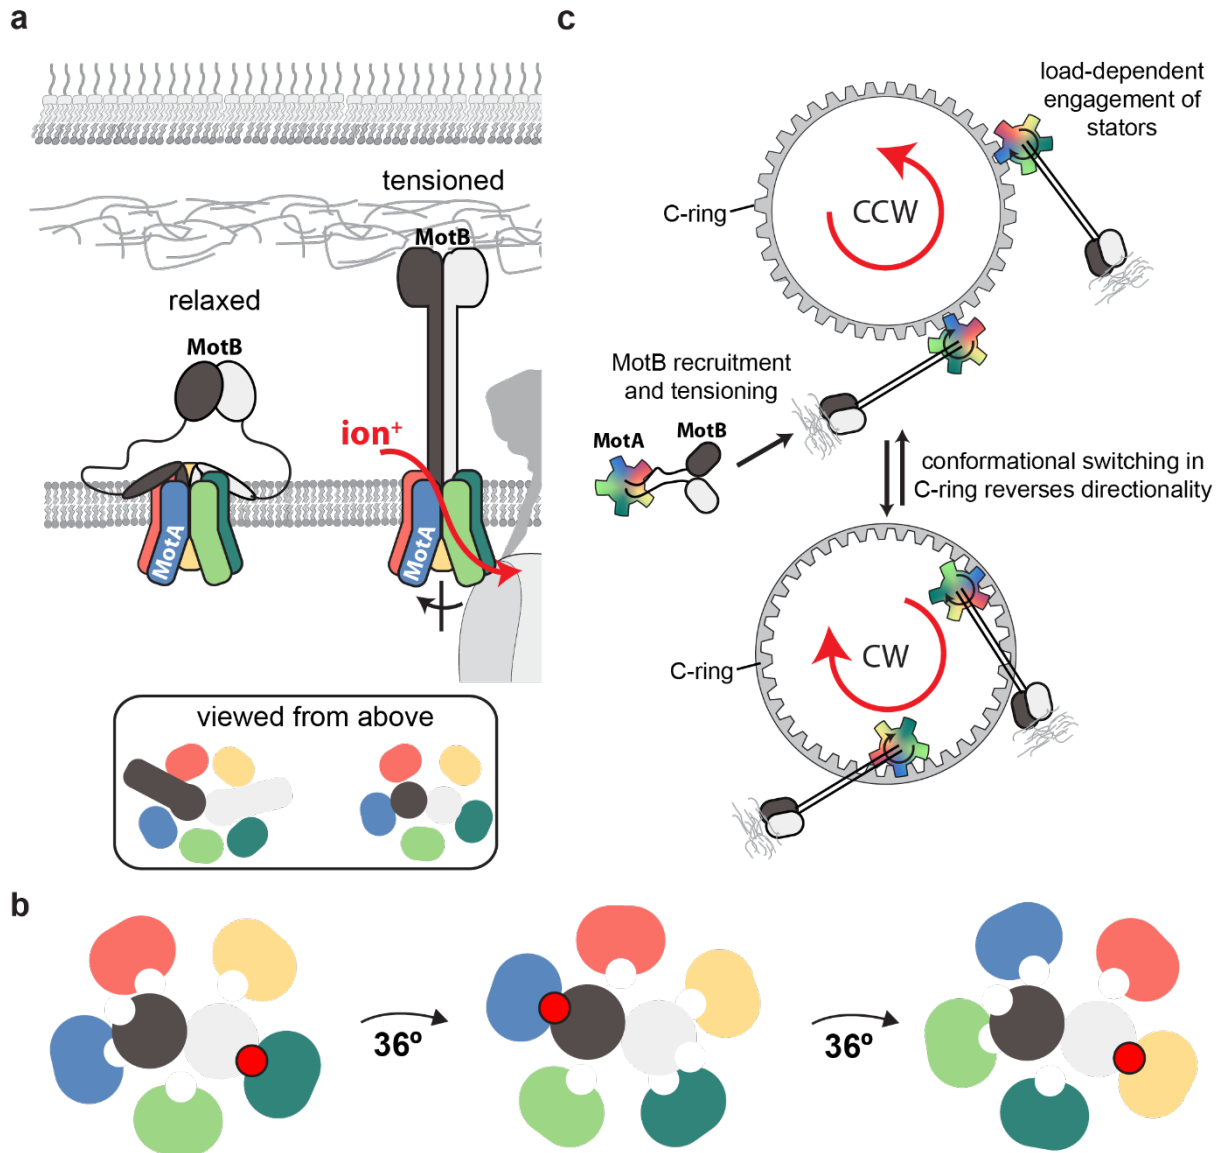

308

309 **Figure 4. Mechanistic model for the generation of bi-directional flagellar torque. a,**  
 310 Activation of the stator complex from the structurally resolved state (here termed ‘relaxed’)  
 311 to form a ‘tensioned’ state permissive to ion-flow. This conformational change is likely driven  
 312 by interactions between the C-terminal peptidoglycan binding domains (black and white  
 313 ovals) of MotB and the peptidoglycan layer, as well as interactions between the stator and  
 314 the C-ring complex. **b,** Cartoon showing top views of the intra-membrane core of the stator  
 315 complex with five MotA chains surrounding two MotB subunits. Bound ions are shown as red  
 316 spheres. Ion flow leads to rotation of the MotA ring through alternating formation of MotB-  
 317 ion-MotA interactions by the two MotB chains that processes around the surrounding MotA  
 318 subunits. **c,** Model describing how a stator that rotates in one direction can drive either  
 319 clockwise (CW) or counterclockwise (CCW) rotation of the flagellum depending on the  
 320 conformational state of the C-ring.



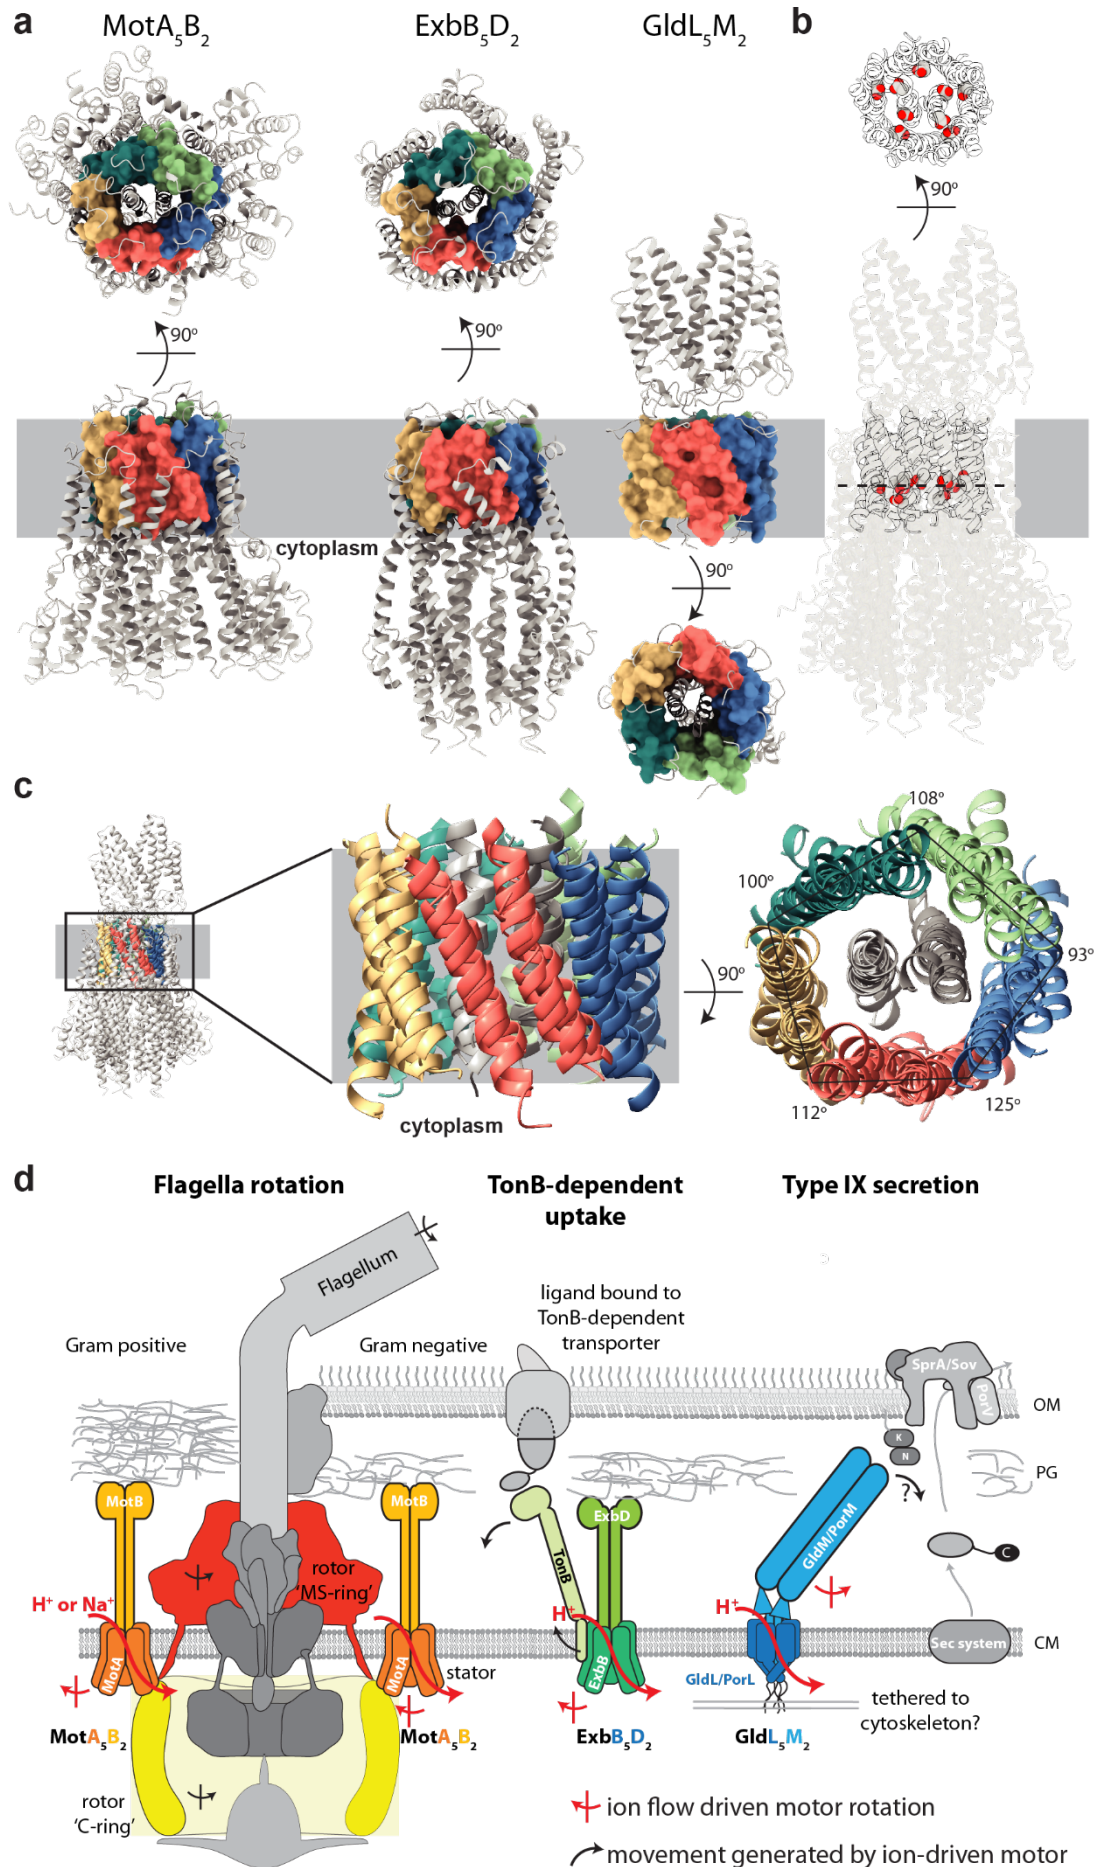

322 **Figure 5. Conservation of core architecture between diverse families of ion-driven motors.**  
323 **a**, Representatives of three ion-driven motor families that share a common structural core.  
324 Complexes are shown as grey cartoons with helices equivalent to those in the MotA inner ring  
325 displayed in coloured surface representation. **b**, Overlay of the three complexes (common  
326 core in grey cartoons, other structure semi-transparent cartoons). Mechanistically essential  
327 charged residues within the common core (space filling side chains; C, grey; O, red) occur at  
328 the same height with respect to the membrane irrespective of whether they occur on the  
329 MotA- or MotB-equivalent chain. **c**, Overlay of the common core of the three complexes. The  
330 distortion from pentamer symmetry within the membrane is shared between all three  
331 families **d**, Cartoon summarising the updated view of how the three families of ion-driven  
332 motors are coupled to their different biological effects. Note that ion movement drives  
333 rotation of the central subunits in GldLM but of the peripheral subunits in MotAB/ExbBD. OM,  
334 outer membrane; CM, cytoplasmic membrane; PG, peptidoglycan  
335

336 **Table 1.** Cryo-EM data collection, refinement and validation statistics

337

|                                                     | <i>C. sporogenes</i><br>MotAB<br>(EMDB-10895)<br>(PDB ID 6YSF) | <i>B. subtilis</i><br>MotAB<br>(EMDB-10899)<br>(PDB ID 6YSL) | <i>V. mimicus</i><br>PomAB<br>(EMDB-10901) | <i>E. coli</i><br>ExbBD<br>(EMDB-10902) | <i>P. savastanoi</i><br>ExbBD<br>(EMDB-10897) |
|-----------------------------------------------------|----------------------------------------------------------------|--------------------------------------------------------------|--------------------------------------------|-----------------------------------------|-----------------------------------------------|
| <b>Data collection and processing</b>               |                                                                |                                                              |                                            |                                         |                                               |
| Magnification                                       | 165,000                                                        | 165,000                                                      | 165,000                                    | 165,000                                 | 165,000                                       |
| Voltage (kV)                                        | 300                                                            | 300                                                          | 300                                        | 300                                     | 300                                           |
| Electron exposure (e <sup>-</sup> /Å <sup>2</sup> ) | 48                                                             | 48                                                           | 48                                         | 48                                      | 48                                            |
| Defocus range (µm)                                  | 1.0-3.0                                                        | 1.0-3.0                                                      | 1.0-3.0                                    | 1.0-2.5                                 | 1.0-3.0                                       |
| Pixel size (Å)                                      | 0.822                                                          | 0.822                                                        | 0.822                                      | 0.822                                   | 0.822                                         |
| Symmetry imposed                                    | C1                                                             | C1                                                           | C1                                         | C1                                      | C1                                            |
| Initial particle images (no.)                       | 1,998,900                                                      | 1,532,430                                                    | 2,383,022                                  | 2,045,350                               | 1,342,937                                     |
| Final particle images (no.)                         | 314,230                                                        | 122,615                                                      | 244,654                                    | 227,700                                 | 65,617                                        |
| Map resolution (Å)                                  | 3.4                                                            | 3.5                                                          | 4.2                                        | 4.6                                     | 3.8                                           |
| FSC threshold                                       | 0.143                                                          | 0.143                                                        | 0.143                                      | 0.143                                   | 0.143                                         |
| Map resolution range (Å)                            | 3.2-5.2                                                        | 3.3-6.0                                                      | 3.9-6.5                                    | 4.0-6.5                                 | 3.6-6.1                                       |
| <b>Refinement</b>                                   |                                                                |                                                              |                                            |                                         |                                               |
| Initial model used (PDB code)                       | None                                                           | None                                                         |                                            |                                         |                                               |
| Model resolution (Å)                                | 3.4                                                            | 3.5                                                          |                                            |                                         |                                               |
| FSC threshold                                       | 0.143                                                          | 0.143                                                        |                                            |                                         |                                               |
| Model resolution range (Å)                          | 3.2-5.2                                                        | 3.3-6.0                                                      |                                            |                                         |                                               |
| Map sharpening <i>B</i> factor (Å <sup>2</sup> )    | -117                                                           | -104                                                         |                                            |                                         |                                               |
| <b>Model composition</b>                            |                                                                |                                                              |                                            |                                         |                                               |
| Non-hydrogen atoms                                  | 10220                                                          | 10128                                                        |                                            |                                         |                                               |
| Protein residues                                    | 1327                                                           | 1324                                                         |                                            |                                         |                                               |
| Ligands                                             | 0                                                              | 0                                                            |                                            |                                         |                                               |
| <b><i>B</i> factors (Å<sup>2</sup>)</b>             |                                                                |                                                              |                                            |                                         |                                               |
| Protein                                             | 53                                                             | 99                                                           |                                            |                                         |                                               |
| Ligand                                              | NA                                                             | NA                                                           |                                            |                                         |                                               |
| <b>R.m.s. deviations</b>                            |                                                                |                                                              |                                            |                                         |                                               |
| Bond lengths (Å)                                    | 0.004                                                          | 0.007                                                        |                                            |                                         |                                               |
| Bond angles (°)                                     | 0.757                                                          | 1.425                                                        |                                            |                                         |                                               |
| <b>Validation</b>                                   |                                                                |                                                              |                                            |                                         |                                               |
| MolProbity score                                    | 2.15                                                           | 1.85                                                         |                                            |                                         |                                               |
| Clashscore                                          | 13.66                                                          | 5.93                                                         |                                            |                                         |                                               |
| Poor rotamers (%)                                   | 0.90                                                           | 0.47                                                         |                                            |                                         |                                               |
| <b>Ramachandran plot</b>                            |                                                                |                                                              |                                            |                                         |                                               |
| Favored (%)                                         | 91.47                                                          | 90.92                                                        |                                            |                                         |                                               |
| Allowed (%)                                         | 8.53                                                           | 9.01                                                         |                                            |                                         |                                               |
| Disallowed (%)                                      | 0.00                                                           | 0.08                                                         |                                            |                                         |                                               |

338

339

340

## 341 **Methods**

342

### 343 **Bacterial strains and plasmids**

344 Bacterial strains and plasmids used in this study are listed in Supplementary Table 1.

345 The pT12 backbone used for all protein expression was derived from Kuhlen *et al*<sup>41</sup>. Plasmids

346 were generated by Gibson assembly of PCR fragments using the NEBuilder HiFi Master Mix

347 (NEB). Fragments were created by PCR with the relevant primers (listed in Supplementary

348 Table 2) using Q5 polymerase (NEB) and genomic DNA templates obtained from the Leibniz

349 Institute [dsmz.de]: *Vibrio mimicus* (DSM 19130), *Bacillus subtilis* 168 (DSM 402), *Clostridium*

350 *sporogenes* 388 (DSM 795), *Escherichia coli* W (DSM 1116), *Pseudomonas savastanoi*, pv.

351 *phaseolicola* 1448A (DSM 21482). Gibson assembly and PCR were carried out following the

352 manufacturer's recommendations. *E. coli* RP6894 ( $\Delta$ *motAB*) for motility assays was generated

353 by J. S. Parkinson and gifted by D.F. Blair.

354

### 355 **Purification of MotAB/PomAB and ExbBD complexes**

356 *V. mimicus* PomAB, its derivative PomAB $_{\Delta 61-120}$  lacking unstructured periplasmic

357 residues of PomB, *B. subtilis* MotAB, *C. sporogenes* MotAB, *E. coli* ExbBD, and *P. savastanoi*

358 TonB-ExbBD complexes were expressed in *E. coli* MT56 as a single operon from a pT12 vector

359 encoding a C-terminal twin-strep tag. Purification steps were similar across all constructs and

360 carried out at 4 °C. Briefly, cells were grown at 37 °C for 16 h in TB media containing

361 kanamycin (50 µg/mL) and rhamnose monohydrate (0.1% w/v) then collected by

362 centrifugation at 4,000*g*. Cell pellets were resuspended in TBS (100 mM Tris, 150 mM NaCl,

363 1 mM EDTA pH 8.0) plus 30 µg/mL DNase I and 400 µg/mL lysozyme for 30 mins before

364 passage through an EmulsiFlex C5 homogenizer (Avestin) at 15,000 psi. Unbroken cells were



365 removed by centrifugation at 24,000g for 20 min. The supernatant was recovered and total  
366 membranes were collected by centrifugation at 200,000g for 1.5 h. Membranes were  
367 resuspended in TBS and solubilized by incubation with 1% (w/v) lauryl maltose neopentyl  
368 glycol (LMNG; Anatrace) for 2 h. Insoluble material was removed by centrifugation at  
369 100,000g for 30 min. Solubilized membranes were then applied to a Streptactin XT column  
370 (IBA Lifesciences). The resin was washed with 10 column volumes (CV) of TBS containing  
371 0.02% (w/v) LMNG and proteins were eluted in 5 CV of TBS supplemented with 0.01% (w/v)  
372 LMNG and 50 mM D-biotin (IBA Lifesciences). Eluates were concentrated using a 100-kDa  
373 molecular weight cutoff (MWCO) Vivaspin 6 (GE Healthcare) centrifugal filter unit and  
374 injected onto a Superose 6 Increase 10/300 GL size exclusion column (GE Healthcare) pre-  
375 equilibrated in TBS plus 0.01% (w/v) LMNG. Peak fractions were collected and concentrated  
376 using a 100-kDa MWCO Vivaspin 500 (GE Healthcare) centrifugal filter unit.

377 For *P. savastanoi* TonB-ExbBD and ExbBD complexes, SEC-MALS analysis was carried  
378 out by injecting 100  $\mu$ L ( $A_{280\text{nm}} = 1.0$ ) of either sample onto a Superose 6 increase 10/300 GL  
379 (GE Healthcare) equilibrated in TBS containing 0.02% (w/v) LMNG. Light scattering and  
380 refractive index changes were measured using a Dawn Heleos-II light-scattering detector and  
381 an Optilab-TrEX refractive index monitor. Analysis was carried out using ASTRA 6.1.1.17  
382 software using a theoretical extinction coefficient of 1.02 ( $\text{Abs}_{0.1\%}$ ) and a protein  $dn/dc$  value  
383 of 0.186 mL/g and a detergent  $dn/dc$  value of 0.143 mL/g.

384

### 385 **Cryo-EM sample preparation and imaging**

386 Purified complexes (4  $\mu$ L each) of *V. mimicus* PomAB ( $A_{280\text{nm}} = 0.5$ ), PomAB $_{\Delta 61-120}$   
387 ( $A_{280\text{nm}} = 0.55$ ), *B. subtilis* MotAB ( $A_{280\text{nm}} = 1.0$ ), *C. sporogenes* MotAB ( $A_{280\text{nm}} = 0.8$ ), *E. coli*  
388 ExbBD ( $A_{280\text{nm}} = 3.2$ ), or *P. savastanoi* TonB-ExbBD ( $A_{280\text{nm}} = 2.0$ ) were adsorbed to glow-

389 discharged holey carbon-coated grids (Quantifoil 300 mesh, Au R1.2/1.3) for 10 s. Grids were  
390 then blotted for 2 s at 100% humidity at 8°C and frozen in liquid ethane using a Vitrobot Mark  
391 IV (FEI). Alternatively, specimens were prepared by supplementing *V. mimicus* PomAB ( $A_{280\text{nm}}$   
392 = 2.3), PomAB $_{\Delta 61-120}$  ( $A_{280\text{nm}}$  = 3.7), *B. subtilis* MotAB ( $A_{280\text{nm}}$  = 7.2), *C. sporogenes* MotAB  
393 ( $A_{280\text{nm}}$  = 8.6), *E. coli* ExbBD ( $A_{280\text{nm}}$  = 4.2) with 0.7 mM fluorinated octyl maltoside (fluo OM;  
394 Anatrace) prior to grid preparation.

395 Data were collected in counting mode on a Titan Krios G3 (FEI) operating at 300 kV  
396 with a GIF energy filter (Gatan) and K2 Summit detector (Gatan) using a pixel size of 0.822 Å  
397 and a total dose of 48 e<sup>-</sup>/Å<sup>2</sup> spread across 20 or 32 fractions. Except for *P. savastanoi* TonB-  
398 ExbBD, all datasets included movies from grids prepared with and without the presence of  
399 fluo OM to improve distribution of particle orientations.

400

#### 401 **Cryo-EM data processing**

402 Motion correction and dose weighting were performed using MotionCor  
403 implemented in Relion 3.0<sup>42</sup>. Contrast transfer functions were calculated using CTFFIND4<sup>43</sup>.  
404 Particles were picked in Simple<sup>44</sup> and processed in Relion 3.0<sup>42</sup>. Gold standard Fourier shell  
405 correlations using the 0.143 criterion and local resolution estimations were calculated within  
406 Relion<sup>42</sup> (Extended Data Fig. 2).

407 *V. mimicus* PomAB particles (1,172,445) underwent one round of reference-free 2D  
408 classification, from which 253,681 particles were selected and used to generate an *ab initio*  
409 initial model. This model was low-pass filtered to 30 Å and used as reference for 3D  
410 classification, generating a class that refined to 6.8 Å from 155,280 particles.

411 For the deletion construct PomAB $_{\Delta 61-120}$  that improved particle orientations and data  
412 quality, particles (2,383,062) were extracted from 13,980 movies. Following one round of

413 reference-free 2D classification, 800,844 particles were classified in 3D (4 classes) against a  
414 40 Å low-pass filtered map of PomAB. A class containing 244,654 particles was further  
415 subjected to masked refinement yielding a 4.8 Å map. Refinement after Bayesian particle  
416 polishing and per-particle defocus with beamtilt estimation further improved map quality to  
417 4.2 Å.

418 *B. subtilis* MotAB particles (1,532,430) were extracted over 11,588 movies. After 2D  
419 classification, selected particles (397,584) underwent two rounds of 3D classification (3  
420 classes each) using a 40 Å low-pass filtered map generated from a subset of particles refined  
421 against a 60 Å low-pass filtered map of PomAB<sub>Δ61-120</sub>. A class made up of 122,615 particles  
422 was refined to 3.9 Å. Bayesian particle polishing further improved map resolution by 0.2 Å,  
423 and subsequent CTF refinement using per-particle defocus with beamtilt estimation  
424 generated a 3.5 Å map. To improve MotB N-terminal and plug densities, a subset of  
425 fluorinated particles (43,375) was selected and refined against the 3.5 Å reconstruction,  
426 generating a 5.0 Å map that was used to depict these regions in Extended Data Fig. 5.

427 *C. sporogenes* MotAB particles (1,998,900) were extracted from 9,148 movies and  
428 subjected to a round of reference-free 2D classification. Initial 3D classification performed  
429 against a 60 Å low-pass filtered map of *B. subtilis* MotAB revealed two prominent classes  
430 which represented a monomeric MotAB complex and a non-physiological end-to-end dimer  
431 of MotAB. These classes were used as references in a supervised multi-reference 3D  
432 classification against the full 1,137,357 particle set to exclude dimeric particles. Unsupervised  
433 3D classification (4 classes) performed against 865,446 monomeric particles and further  
434 refinement yielded 3.8 Å from 314,230 particles. Bayesian particle polishing followed by per-  
435 particle defocus with beamtilt estimation further improved map quality to 3.4 Å.

436 Movies (6,902) were collected for *E. coli* ExbBD, resulting in the extraction of  
437 2,045,350 particles. Following one round of reference-free 2D classification, an initial model  
438 of ExbBD was generated by 3D classification and refinement of a particle subset against a 40  
439 Å low-pass filtered 5:1 ExbBD complex<sup>34</sup> (EMD-6928). The resulting map was used as initial  
440 model for multiple rounds of 3D classification against the full 2D-classified particle set  
441 (755,677). After refinement of 227,700 particles, this protocol generated a 5.8 Å map,  
442 improving to 4.6 Å following Bayesian particle polishing and per-particle defocus plus beamtilt  
443 estimation.

444 Movies (4,232) were collected for *P. savastanoi* TonB-ExbBD and 1,342,900 particles  
445 were extracted. Particles were subjected to two rounds of 2D classification with centered re-  
446 extraction between classifications. The cleaned 499,697 particles were subjected to C5-  
447 symmetric 3D classification against a 40 Å low-pass filtered 5:2 ExbBD map from *E. coli*. The  
448 resultant 202,356 particles were refined with C5 symmetry to generate a 3.5 Å map that  
449 lacked density for the transmembrane helices (TMHs) of ExbD. Particles were polished and  
450 subjected to an additional round of 2D classification followed by 3D classification with C1  
451 symmetry, resulting in 3.9 Å map from 110,164 particles after refinement in C1. An additional  
452 round of Bayesian polishing and refinement (C1) yielded a 3.8 Å map. Per-particle defocus  
453 and beamtilt estimation followed by alignment-free 3D classification and subsequent local  
454 refinement (C1) yielded a 3.8 Å map with improved density for the TMHs of ExbD from 65,617  
455 particles.

456

### 457 **Model building and refinement**

458 Atomic models were built using Coot<sup>45</sup>. Multiple rounds of rebuilding (in both the  
459 globally sharpened and local-resolution filtered maps) and real-space refinement in Phenix<sup>46</sup>

460 using secondary structure, rotamer and Ramachandran restraints yielded the final models  
461 described in Table 1. All models were validated using Molprobit<sup>47</sup>. Conservation analysis was  
462 carried out using the ConSurf server<sup>48</sup>. A homology model of *E. coli* MotAB was generated by  
463 sequence threading against the *Clostridium* model using Phyre2<sup>49</sup>. Figures were prepared  
464 using UCSF ChimeraX<sup>50</sup> and Pymol (The PyMOL Molecular Graphics System, Version 2.0  
465 Schrödinger, LLC). All models depicted in figures are based on the highest resolution  
466 *Clostridium* model, unless otherwise specified. Residue numbering adopts the reference *E.*  
467 *coli* sequence and model; a residue conversion table is provided (Supplementary Table 3).

468

#### 469 **Evolutionary covariance analysis**

470 Coevolutionary contacts for *E. coli* W MotA were determined by the Gremlin web-  
471 server<sup>5</sup>. Searches used the Jackhmmer algorithm for multiple sequence alignment, an E-value  
472 threshold of  $10^{-10}$  and a minimum coverage of 75%. Intra- and intermolecular contacts were  
473 mapped to the *E. coli* MotA structure using Gremlin beta<sup>5</sup>. Intermolecular contacts between  
474 MotA and MotB (residues 1-120) were determined using an E-value threshold of  $10^{-20}$  and  $10^{-$   
475  $2$ , respectively. Intermolecular contacts between TonB and ExbB were determined using an E-  
476 value threshold of  $10^{-20}$ . Contacts with a probability score greater than 0.9 were regarded as  
477 significant and listed in Supplementary Table 4.

478

#### 479 **Simulation setup**

480 All simulations were run using GROMACS 2018<sup>51</sup>. The systems were initially setup  
481 using the Martini 2.2 coarse-grain (CG) force field and solvated with water and 0.15 M NaCl  
482 to neutralise the system<sup>52</sup>. The membranes were constructed using INSANE with a 4:1 ratio  
483 of POPE:POPG lipids<sup>53</sup>. An elastic network of  $1000 \text{ kJ mol}^{-1} \text{ nm}^{-2}$  was applied between all

484 backbone beads between 0.5 and 1 nm. Electrostatics were described using the reaction field  
485 method, with a cut-off of 1.1 nm using the potential shift modifier and the van der Waals  
486 interactions were shifted between 0.9-1.1 nm. The systems were first energy minimised by  
487 steepest descent algorithm to  $1000 \text{ kJ mol}^{-1} \text{ nm}^{-1}$  and then simulated for a total of 1  $\mu\text{s}$ . The  
488 temperature and pressure were kept constant throughout the simulation at 310 K and 1 bar  
489 respectively, with protein, lipids and water/ions coupled individually to a temperature bath  
490 by the V-rescale method<sup>54</sup> and a semi-isotropic Parrinello-Rahman barostat<sup>55</sup>. The final  
491 snapshots from the CG simulations were then converted back to an atomistic description  
492 using CG2AT<sup>56</sup>.

493

#### 494 **Atomistic simulations**

495 The charged N- and C- termini of the converted protein were capped using acetyl and  
496 methyl moieties, respectively. All ionisable groups were simulated with default protonation  
497 states, unless otherwise mentioned. The virtual site model for hydrogen atoms<sup>57</sup>, adapted for  
498 the charmm36 forcefield<sup>58</sup> was employed, allowing the use of a 4 fs timestep during the  
499 simulations. Electrostatics were described using PME, with a cut-off of 1.2 nm and the van  
500 der Waals interactions were shifted between 1-1.2 nm. The tip3p water model was used, the  
501 water bond angles and distances were constrained by SETTLE<sup>59</sup>. All other bonds were  
502 constrained using the LINCS algorithm<sup>60</sup>. The systems were then equilibrated for a further 1  
503 ns using a 4 fs timestep with positional restraints of  $1000 \text{ kJ mol}^{-1} \text{ nm}^{-2}$  on the heavy atoms,  
504 in a NPT ensemble with temperature V-rescale coupling at 310 K<sup>54</sup> and semi-isotropic  
505 Parrinello-Rahman barostat at 1 bar with protein, lipids and water/ions coupled individually<sup>55</sup>.  
506 The Production simulations were performed without position restraints for a total of 200 ns  
507 and were run in triplicate.

508

### 509 **Motility assay**

510 *E. coli* RP6894 ( $\Delta$ *motAB*) was transformed with pT12-derived plasmids encoding C-  
511 terminal twin-strep tagged MotAB containing point mutations or appropriate controls.  
512 Saturated overnight cultures (2  $\mu$ L) were injected into soft agar plates (0.3% w/v agar in  
513 tryptone broth) containing kanamycin (30  $\mu$ g/mL) plus rhamnose monohydrate (0.5% w/v)  
514 and incubated in a humidified chamber for 23 h at 25 °C.

515

### 516 **Pulldowns**

517 *E. coli* MT56 was transformed with pT12-derived plasmids encoding C-terminal twin-  
518 strep tagged MotAB harbouring point mutations or appropriate controls. Small scale (5 mL)  
519 cultures were grown at 37 °C for 16 h in TB media containing kanamycin (50  $\mu$ g/mL) and  
520 rhamnose monohydrate (0.1% w/v). OD<sub>600</sub>-normalized cell counts were centrifuged at 4,000g  
521 for 5 min and pellets frozen at -80 °C. After thawing, cells were lysed by resuspension in 200  
522 mM Tris pH 8.0, 300 mM NaCl, 2 mM EDTA plus 30  $\mu$ g/mL DNase I and 400  $\mu$ g/mL lysozyme  
523 for 30 min, then solubilized in 1.5 % w/v LMNG for 1 h. Insoluble material was removed by  
524 centrifugation at 18,000g for 30 min. LMNG-solubilized lysates were added to 5  $\mu$ g of TBS-  
525 prewashed MagStrep XT magnetic beads (IBA Lifesciences) for 1 h with mild shaking. Beads  
526 were isolated and washed twice with TBS plus 0.025% w/v LMNG followed by elution with  
527 TBS plus 0.025% w/v LMNG and 50 mM D-biotin. Eluates were diluted in SDS-PAGE sample  
528 buffer and run on a 4–20% polyacrylamide gel (NuSep). The gel was stained with InstantBlue  
529 (Expedeon) to determine the presence of MotA and MotB.

530

### 531 **Reporting summary**

532

533 **Data availability**

534 The data that support the findings of this study are available from the corresponding author  
535 upon reasonable request. Cryo-EM volumes and atomic models have been deposited to the  
536 EMDB (accession codes EMD-10895, EMD-10899, EMD-10901, EMD-10902, EMD-10897) and  
537 PDB (accession codes 6YSF and 6YSL), respectively. Source data for gel shown in Extended  
538 Data Fig. 10 are provided with the paper.

539

540

541 **References**

- 542 1 Berg, H. C. The rotary motor of bacterial flagella. *Annu Rev Biochem* **72**, 19-54,  
543 doi:10.1146/annurev.biochem.72.121801.161737 (2003).
- 544 2 Leeuwenhoek, A. Observation, communicated to the publisher by Mr Anthony van  
545 Leewenhoek, in a Dutch letter of the 9 Octob. 1676 here English'd: concerning little  
546 animals by him observed in rain-well-sea and snow water; as also in water wherein  
547 pepper had lain infused. *Phil. Trans.* **12**, 821-831, doi:doi:10.1098/rstl.1677.0003  
548 (1677).
- 549 3 Nakamura, S. & Minamino, T. Flagella-Driven Motility of Bacteria. *Biomolecules* **9**,  
550 doi:10.3390/biom9070279 (2019).
- 551 4 Johnson, S. *et al.* Symmetry mismatch in the MS-ring of the bacterial flagellar rotor  
552 explains the structural coordination of secretion and rotation. *Nat Microbiol*,  
553 doi:10.1038/s41564-020-0703-3 (2020).
- 554 5 Ovchinnikov, S. *et al.* Large-scale determination of previously unsolved protein  
555 structures using evolutionary information. *Elife* **4**, e09248, doi:10.7554/eLife.09248  
556 (2015).
- 557 6 Kojima, S. Dynamism and regulation of the stator, the energy conversion complex of  
558 the bacterial flagellar motor. *Curr Opin Microbiol* **28**, 66-71,  
559 doi:10.1016/j.mib.2015.07.015 (2015).
- 560 7 Blair, D. F. & Berg, H. C. Restoration of torque in defective flagellar motors. *Science*  
561 **242**, 1678-1681, doi:10.1126/science.2849208 (1988).
- 562 8 Blair, D. F. & Berg, H. C. The MotA protein of *E. coli* is a proton-conducting component  
563 of the flagellar motor. *Cell* **60**, 439-449, doi:10.1016/0092-8674(90)90595-6 (1990).
- 564 9 Larsen, S. H., Adler, J., Gargus, J. J. & Hogg, R. W. Chemomechanical coupling without  
565 ATP: the source of energy for motility and chemotaxis in bacteria. *Proc Natl Acad Sci*  
566 *U S A* **71**, 1239-1243, doi:10.1073/pnas.71.4.1239 (1974).



- 567 10 Asai, Y., Yakushi, T., Kawagishi, I. & Homma, M. Ion-coupling determinants of Na+-  
568 driven and H+-driven flagellar motors. *J Mol Biol* **327**, 453-463, doi:10.1016/s0022-  
569 2836(03)00096-2 (2003).
- 570 11 Kojima, S. & Blair, D. F. Solubilization and purification of the MotA/MotB complex of  
571 Escherichia coli. *Biochemistry* **43**, 26-34, doi:10.1021/bi035405l (2004).
- 572 12 Nirody, J. A., Sun, Y.-R. & Lo, C.-J. The biophysicist's guide to the bacterial flagellar  
573 motor. *Advances in Physics: X* **2**, 324-343, doi:10.1080/23746149.2017.1289120  
574 (2017).
- 575 13 Kojima, S. *et al.* The Helix Rearrangement in the Periplasmic Domain of the Flagellar  
576 Stator B Subunit Activates Peptidoglycan Binding and Ion Influx. *Structure* **26**, 590-598  
577 e595, doi:10.1016/j.str.2018.02.016 (2018).
- 578 14 Zhu, S. *et al.* Conformational change in the periplasmic region of the flagellar stator  
579 coupled with the assembly around the rotor. *Proc Natl Acad Sci U S A* **111**, 13523-  
580 13528, doi:10.1073/pnas.1324201111 (2014).
- 581 15 Kim, E. A., Price-Carter, M., Carlquist, W. C. & Blair, D. F. Membrane segment  
582 organization in the stator complex of the flagellar motor: implications for proton flow  
583 and proton-induced conformational change. *Biochemistry* **47**, 11332-11339,  
584 doi:10.1021/bi801347a (2008).
- 585 16 Kojima, S. & Blair, D. F. Conformational change in the stator of the bacterial flagellar  
586 motor. *Biochemistry* **40**, 13041-13050, doi:10.1021/bi011263o (2001).
- 587 17 Mandadapu, K. K., Nirody, J. A., Berry, R. M. & Oster, G. Mechanics of torque  
588 generation in the bacterial flagellar motor. *Proc Natl Acad Sci U S A* **112**, E4381-4389,  
589 doi:10.1073/pnas.1501734112 (2015).
- 590 18 Boschert, R., Adler, F. R. & Blair, D. F. Loose coupling in the bacterial flagellar motor.  
591 *Proc Natl Acad Sci U S A* **112**, 4755-4760, doi:10.1073/pnas.1419955112 (2015).
- 592 19 Nishihara, Y. & Kitao, A. Gate-controlled proton diffusion and protonation-induced  
593 ratchet motion in the stator of the bacterial flagellar motor. *Proc Natl Acad Sci U S A*  
594 **112**, 7737-7742, doi:10.1073/pnas.1502991112 (2015).
- 595 20 Braun, T. F., Al-Mawsawi, L. Q., Kojima, S. & Blair, D. F. Arrangement of core  
596 membrane segments in the MotA/MotB proton-channel complex of Escherichia coli.  
597 *Biochemistry* **43**, 35-45, doi:10.1021/bi035406d (2004).
- 598 21 Braun, T. F. & Blair, D. F. Targeted disulfide cross-linking of the MotB protein of  
599 Escherichia coli: evidence for two H(+) channels in the stator Complex. *Biochemistry*  
600 **40**, 13051-13059, doi:10.1021/bi011264g (2001).
- 601 22 Sharp, L. L., Zhou, J. & Blair, D. F. Features of MotA proton channel structure revealed  
602 by tryptophan-scanning mutagenesis. *Proc Natl Acad Sci U S A* **92**, 7946-7950,  
603 doi:10.1073/pnas.92.17.7946 (1995).
- 604 23 Sharp, L. L., Zhou, J. & Blair, D. F. Tryptophan-scanning mutagenesis of MotB, an  
605 integral membrane protein essential for flagellar rotation in Escherichia coli.  
606 *Biochemistry* **34**, 9166-9171, doi:10.1021/bi00028a028 (1995).
- 607 24 Yakushi, T., Yang, J., Fukuoka, H., Homma, M. & Blair, D. F. Roles of charged residues  
608 of rotor and stator in flagellar rotation: comparative study using H+-driven and Na+-  
609 driven motors in Escherichia coli. *J Bacteriol* **188**, 1466-1472,  
610 doi:10.1128/JB.188.4.1466-1472.2006 (2006).
- 611 25 Hosking, E. R. & Manson, M. D. Clusters of charged residues at the C terminus of MotA  
612 and N terminus of MotB are important for function of the Escherichia coli flagellar  
613 motor. *J Bacteriol* **190**, 5517-5521, doi:10.1128/JB.00407-08 (2008).

- 614 26 Hosking, E. R., Vogt, C., Bakker, E. P. & Manson, M. D. The Escherichia coli MotAB  
615 proton channel unplugged. *J Mol Biol* **364**, 921-937, doi:10.1016/j.jmb.2006.09.035  
616 (2006).
- 617 27 Braun, T. F. *et al.* Function of proline residues of MotA in torque generation by the  
618 flagellar motor of Escherichia coli. *J Bacteriol* **181**, 3542-3551 (1999).
- 619 28 Minamino, T., Kinoshita, M. & Namba, K. Directional Switching Mechanism of the  
620 Bacterial Flagellar Motor. *Comput Struct Biotechnol J* **17**, 1075-1081,  
621 doi:10.1016/j.csbj.2019.07.020 (2019).
- 622 29 Lam, K. H. *et al.* Multiple conformations of the FliG C-terminal domain provide insight  
623 into flagellar motor switching. *Structure* **20**, 315-325, doi:10.1016/j.str.2011.11.020  
624 (2012).
- 625 30 Khan, S., Dapice, M. & Humayun, I. Energy transduction in the bacterial flagellar  
626 motor. Effects of load and pH. *Biophys J* **57**, 779-796, doi:10.1016/S0006-  
627 3495(90)82598-4 (1990).
- 628 31 Manson, M. D., Tedesco, P. M. & Berg, H. C. Energetics of flagellar rotation in bacteria.  
629 *J Mol Biol* **138**, 541-561, doi:10.1016/s0022-2836(80)80017-9 (1980).
- 630 32 Marmon, L. Elucidating the origin of the ExbBD components of the TonB system  
631 through Bayesian inference and maximum-likelihood phylogenies. *Mol Phylogenet*  
632 *Evol* **69**, 674-686, doi:10.1016/j.ympev.2013.07.010 (2013).
- 633 33 Celia, H. *et al.* Structural insight into the role of the Ton complex in energy  
634 transduction. *Nature* **538**, 60-65, doi:10.1038/nature19757 (2016).
- 635 34 Maki-Yonekura, S. *et al.* Hexameric and pentameric complexes of the ExbBD energizer  
636 in the Ton system. *Elife* **7**, doi:10.7554/eLife.35419 (2018).
- 637 35 Celia, H. *et al.* Cryo-EM structure of the bacterial Ton motor subcomplex ExbB-ExbD  
638 provides information on structure and stoichiometry. *Commun Biol* **2**, 358,  
639 doi:10.1038/s42003-019-0604-2 (2019).
- 640 36 Swayne, C. & Postle, K. Taking the Escherichia coli TonB transmembrane domain  
641 "offline"? Nonprotonatable Asn substitutes fully for TonB His20. *J Bacteriol* **193**, 3693-  
642 3701, doi:10.1128/JB.05219-11 (2011).
- 643 37 Ollis, A. A., Kumar, A. & Postle, K. The ExbD periplasmic domain contains distinct  
644 functional regions for two stages in TonB energization. *J Bacteriol* **194**, 3069-3077,  
645 doi:10.1128/JB.00015-12 (2012).
- 646 38 Pawelek, P. D. *et al.* Structure of TonB in complex with FhuA, E. coli outer membrane  
647 receptor. *Science* **312**, 1399-1402, doi:10.1126/science.1128057 (2006).
- 648 39 Cascales, E., Lloubes, R. & Sturgis, J. N. The TolQ-TolR proteins energize TolA and share  
649 homologies with the flagellar motor proteins MotA-MotB. *Mol Microbiol* **42**, 795-807,  
650 doi:10.1046/j.1365-2958.2001.02673.x (2001).
- 651 40 McBride, M. J. & Zhu, Y. Gliding motility and Por secretion system genes are  
652 widespread among members of the phylum bacteroidetes. *J Bacteriol* **195**, 270-278,  
653 doi:10.1128/JB.01962-12 (2013).
- 654 41 Kuhlen, L. *et al.* Structure of the core of the type III secretion system export apparatus.  
655 *Nat Struct Mol Biol* **25**, 583-590, doi:10.1038/s41594-018-0086-9 (2018).
- 656 42 Zivanov, J., Nakane, T. & Scheres, S. H. W. A Bayesian approach to beam-induced  
657 motion correction in cryo-EM single-particle analysis. *IUCrJ* **6**, 5-17,  
658 doi:10.1107/S205225251801463X (2019).

- 659 43 Rohou, A. & Grigorieff, N. CTFIND4: Fast and accurate defocus estimation from  
660 electron micrographs. *J Struct Biol* **192**, 216-221, doi:10.1016/j.jsb.2015.08.008  
661 (2015).
- 662 44 Reboul, C. F., Eager, M., Elmlund, D. & Elmlund, H. Single-particle cryo-EM-Improved  
663 ab initio 3D reconstruction with SIMPLE/PRIME. *Protein Sci* **27**, 51-61,  
664 doi:10.1002/pro.3266 (2018).
- 665 45 Brown, A. *et al.* Tools for macromolecular model building and refinement into electron  
666 cryo-microscopy reconstructions. *Acta Crystallogr D Biol Crystallogr* **71**, 136-153,  
667 doi:10.1107/S1399004714021683 (2015).
- 668 46 Afonine, P. V. *et al.* Real-space refinement in PHENIX for cryo-EM and crystallography.  
669 *Acta Crystallogr D Struct Biol* **74**, 531-544, doi:10.1107/S2059798318006551 (2018).
- 670 47 Williams, C. J. *et al.* MolProbity: More and better reference data for improved all-atom  
671 structure validation. *Protein Sci* **27**, 293-315, doi:10.1002/pro.3330 (2018).
- 672 48 Ashkenazy, H. *et al.* ConSurf 2016: an improved methodology to estimate and visualize  
673 evolutionary conservation in macromolecules. *Nucleic Acids Res* **44**, W344-350,  
674 doi:10.1093/nar/gkw408 (2016).
- 675 49 Kelley, L. A., Mezulis, S., Yates, C. M., Wass, M. N. & Sternberg, M. J. The Phyre2 web  
676 portal for protein modeling, prediction and analysis. *Nat Protoc* **10**, 845-858,  
677 doi:10.1038/nprot.2015.053 (2015).
- 678 50 Goddard, T. D. *et al.* UCSF ChimeraX: Meeting modern challenges in visualization and  
679 analysis. *Protein Sci* **27**, 14-25, doi:10.1002/pro.3235 (2018).
- 680 51 Abraham, M. J. *et al.* GROMACS: High performance molecular simulations through  
681 multi-level parallelism from laptops to supercomputers. *SoftwareX* **1-2**, 19-25,  
682 doi:10.1016/j.softx.2015.06.001 (2015).
- 683 52 de Jong, D. H. *et al.* Improved Parameters for the Martini Coarse-Grained Protein  
684 Force Field. *Journal of Chemical Theory and Computation* **9**, 687-697,  
685 doi:10.1021/ct300646g (2012).
- 686 53 Wassenaar, T. A., Ingólfsson, H. I., Böckmann, R. A., Tieleman, D. P. & Marrink, S. J.  
687 Computational Lipidomics with insane: A Versatile Tool for Generating Custom  
688 Membranes for Molecular Simulations. *Journal of Chemical Theory and Computation*  
689 **11**, 2144-2155, doi:10.1021/acs.jctc.5b00209 (2015).
- 690 54 Bussi, G., Donadio, D. & Parrinello, M. Canonical sampling through velocity rescaling.  
691 *The Journal of Chemical Physics* **126**, doi:10.1063/1.2408420 (2007).
- 692 55 Parrinello, M. & Rahman, A. Polymorphic transitions in single crystals: A new  
693 molecular dynamics method. *Journal of Applied Physics* **52**, 7182-7190,  
694 doi:10.1063/1.328693 (1981).
- 695 56 Stansfeld, P. J. & Sansom, M. S. P. From Coarse Grained to Atomistic: A Serial  
696 Multiscale Approach to Membrane Protein Simulations. *Journal of Chemical Theory  
697 and Computation* **7**, 1157-1166, doi:10.1021/ct100569y (2011).
- 698 57 Feenstra, K. A., Hess, B. & Berendsen, H. J. C. Improving efficiency of large time-scale  
699 molecular dynamics simulations of hydrogen-rich systems. *Journal of Computational  
700 Chemistry* **20**, 786-798, doi:10.1002/(sici)1096-987x(199906)20:8<786::Aid-  
701 jcc5>3.0.Co;2-b (1999).
- 702 58 Olesen, K., Awasthi, N., Bruhn, D. S., Pezeshkian, W. & Khandelia, H. Faster Simulations  
703 with a 5 fs Time Step for Lipids in the CHARMM Force Field. *Journal of Chemical Theory  
704 and Computation* **14**, 3342-3350, doi:10.1021/acs.jctc.8b00267 (2018).

705 59 Miyamoto, S. & Kollman, P. A. Settle: An analytical version of the SHAKE and RATTLE  
706 algorithm for rigid water models. *Journal of Computational Chemistry* **13**, 952-962,  
707 doi:10.1002/jcc.540130805 (1992).

708 60 Hess, B., Bekker, H., Berendsen, H. J. C. & Fraaije, J. G. E. M. LINCS: A linear constraint  
709 solver for molecular simulations. *Journal of Computational Chemistry* **18**, 1463-1472,  
710 doi:10.1002/(sici)1096-987x(199709)18:12<1463::Aid-jcc4>3.0.Co;2-h (1997).

711

712

713

714

715

716

717

718

719

720

721

722

723

724





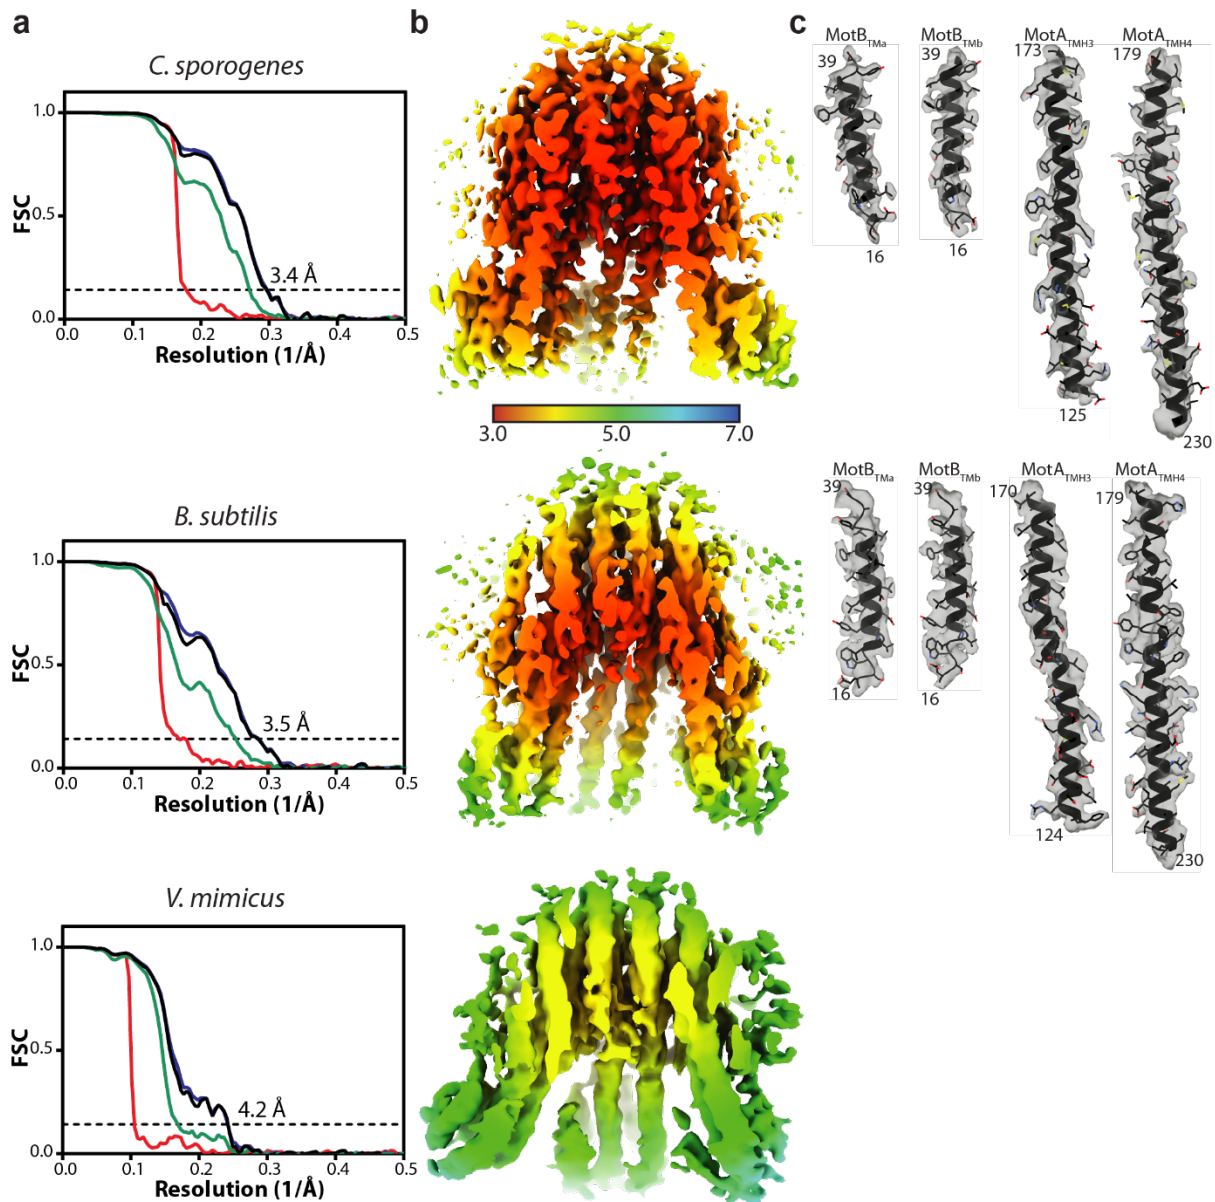

737

738 **Extended Data Fig. 2. Cryo-EM map quality and resolution estimates of stators.** a, Gold-  
739 standard Fourier shell correlation (FSC) curves of RELION-postprocessed stator volumes.  
740 Resolution at the gold-standard cutoff (FSC = 0.143) is indicated. Curves: red, phase-  
741 randomized; green, unmasked; blue, masked; black, MTF-corrected. b, Local resolution  
742 estimates (in Å) of the sharpened volumes. c, Representative modelled densities.  
743

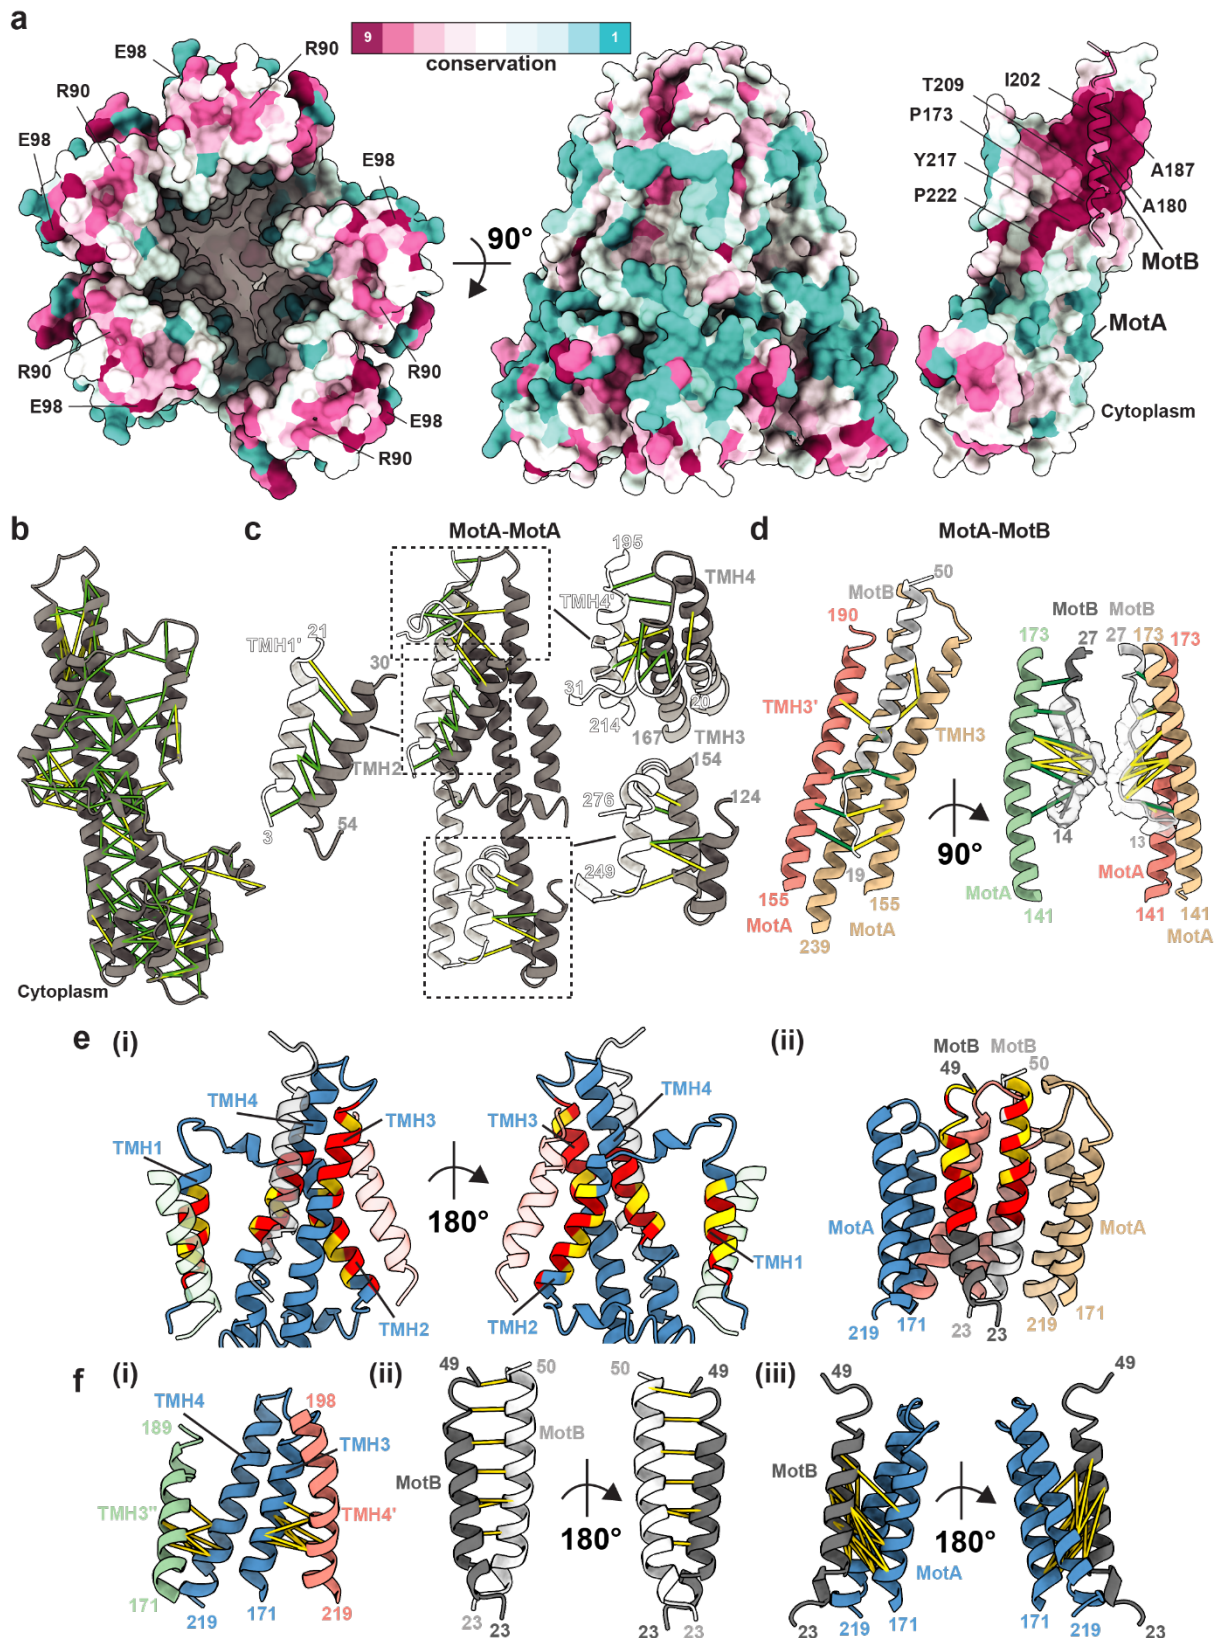

744  
745

746 **Extended Data Fig. 3. Conservation, covariance, and prior mutagenesis data mapped onto**  
747 **the stator structure.** **a**, Surface conservation as determined by ConSurf<sup>48</sup> (maroon high  
748 conservation, cyan low conservation). (Left) View from the cytoplasm showing conservation

749 at the cytoplasmic MotA domains, including residues previously identified to be important for  
750 torque generation<sup>24</sup> (R90 and E98). (Centre) Side view showing poor conservation within  
751 membrane-interfacing residues of MotA. (Right) Cutaway displaying high level of  
752 conservation at the MotA-MotB interface; MotA shown as surface representation, MotB as  
753 ribbon. **b-d**, Evolutionary co-variation of residues (b) within MotA, (c) between MotA  
754 subunits, with boxes highlighting regions of strong covariance that are illustrated in more  
755 detail in the adjacent fragments, or (d) between MotA and MotB with the left hand side  
756 showing contacts for modelled MotB regions and the right hand side showing contacts in the  
757 unmodelled N-terminal MotB density represented here as a poly-alanine backbone.  
758 Predictions were carried out in Gremlin<sup>5</sup> and contacts with a probability score of > 0.9 are  
759 shown. Contacts are coloured by C $\alpha$ -C $\alpha$  distance ( $\leq 10$  Å in green,  $\leq 15$  Å in yellow). **e**, Mapping  
760 previous tryptophan scanning mutagenesis performed on MotA TMHs<sup>22</sup> (i) or MotB<sup>23</sup> (ii) to  
761 the stator structure. MotA and MotB are coloured as in Fig. 2,3 with targeted residues  
762 coloured according to toleration to mutagenesis; yellow corresponds to tolerated mutants  
763 (relative swarm rates > 0.5), red are poorly tolerated mutants (relative swarm rates of  $\leq 0.5$ ).  
764 In (i), TMH4 (green) and TMH2 (red) of neighbouring MotA subunits and MotB (white) are  
765 shown as transparent silhouettes. Poorly tolerated mutants cluster at subunit interfaces. In  
766 (ii) only TMH3-TMH4 of three MotA subunits are shown for clarity. **f**, Mapping previously  
767 determined cysteine crosslinks between (i) MotA-MotA<sup>20</sup>, (ii) MotB-MotB<sup>21</sup>, or (iii) MotA-  
768 MotB<sup>20</sup> to our structure. For displaying crosslinks, a yield of  $\geq 30\%$  disulfide-linked adduct  
769 under iodine oxidizing conditions was used as threshold, except for MotA<sub>TMH4</sub>-MotB crosslinks  
770 which used a  $\geq 10\%$  threshold. All analyses in this figure were performed using an *E. coli*  
771 MotAB structure generated by homology threading onto *C. sporogenes* MotAB.



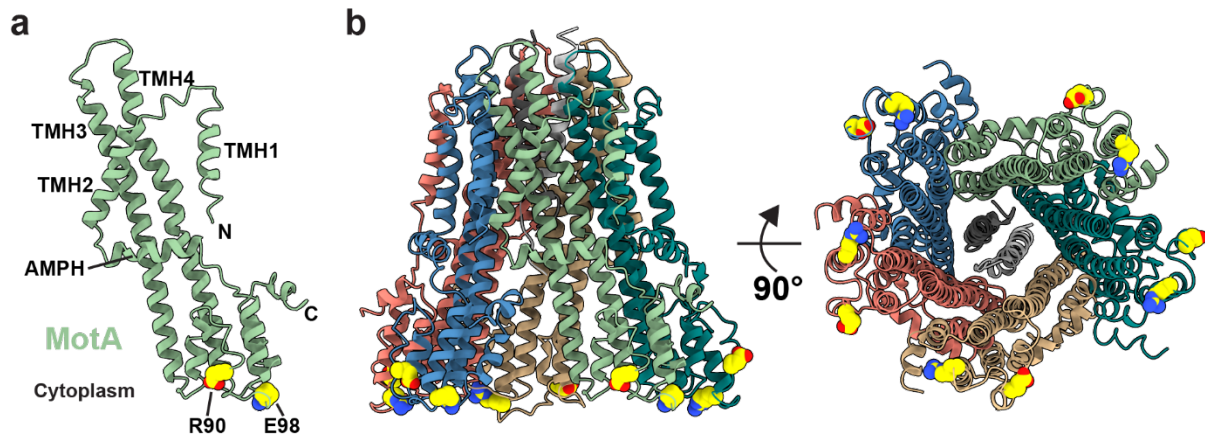

772  
773

774 **Extended Data Fig. 4. Residues that interact with the flagellar C-ring form a charged ring on**  
775 **the cytoplasmic face of MotA. a,** An isolated MotA subunit with the essential torque-  
776 generating charged residues R90 and E98<sup>24</sup> displayed in yellow spheres representation. **b,** The  
777 full *C. sporogenes* stator complex viewed from the side (Left) or from the cytoplasm (Right),  
778 coloured as in Figs. 2-3, and with the torque-generating charged residues represented as in  
779 (a) using *E. coli* MotAB numbering scheme.

780

781

782

783 10

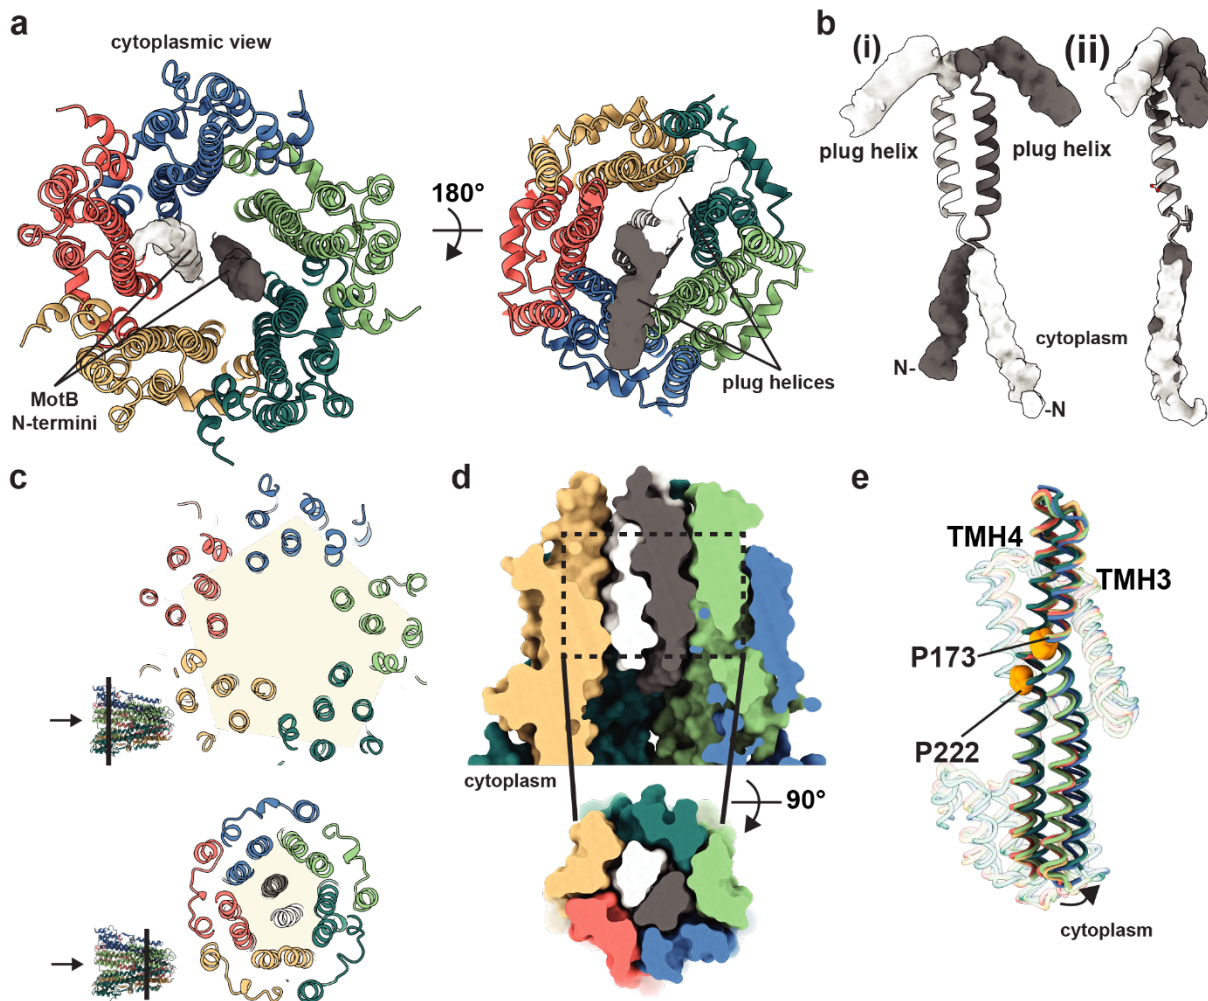

784

785 **Extended Data Fig. 5. Structural elements of the *B. subtilis* stator.** **a**, Structure of the *B.*  
786 *subtilis* stator depicting unmodeled density for the MotB N-terminal extensions (Left) and  
787 plug helices (Right). **b**, (i) Isolated *B. subtilis* MotB dimer represented as in (a), and (ii)  
788 superposition of the TMHs of the two MotB chains showing the relative rotation of the plug  
789 helices. **c**, Slabs at the heights indicated through *B. subtilis* MotAB show distortion from a  
790 regular pentagon (arrow indicates the cytoplasmic side of the complex) as viewed from the  
791 cytoplasm). **d**, Surface representation of *B. subtilis* MotAB showing tight packing. (Top) Side  
792 view with the front of the complex removed. (Bottom) Top-down view of the slab indicated  
793 by dashed lines. **e**, Structural alignment of the five *B. subtilis* MotA chains reveal they fall into  
794 two conformational classes which differ in the degree of flexing at the highlighted prolines.  
795



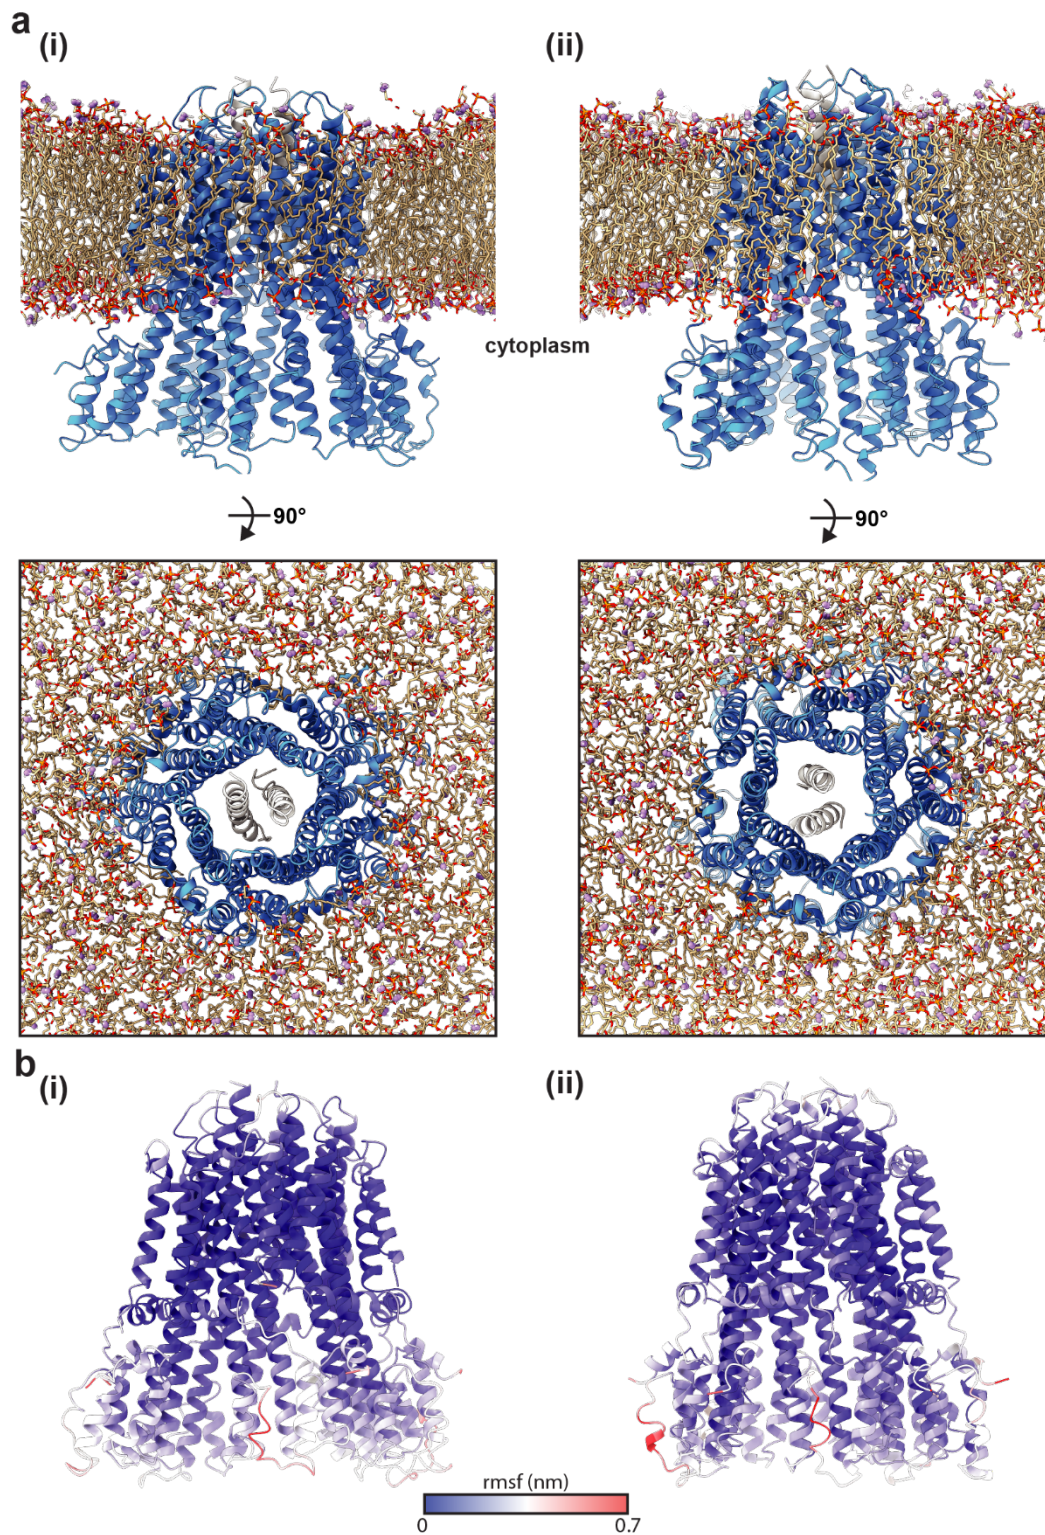

796  
797  
798  
799  
800  
801  
802

**Extended Data Fig. 6. Molecular dynamics simulations of stator structures in lipid bilayers.**  
a, Side (*top*) and top-down (*bottom*) views of (i) *C. sporogenes* and (ii) *B. subtilis* MotAB inserted within a lipid bilayer after extended simulations (coarsegrain for 1  $\mu$ s then atomistic for a further 200 ns). b, Cartoon representation of (i) *Clostridium* MotAB and (ii) *Bacillus* MotAB coloured (blue to red) by the average rmsf of the 3 replica simulations performed.

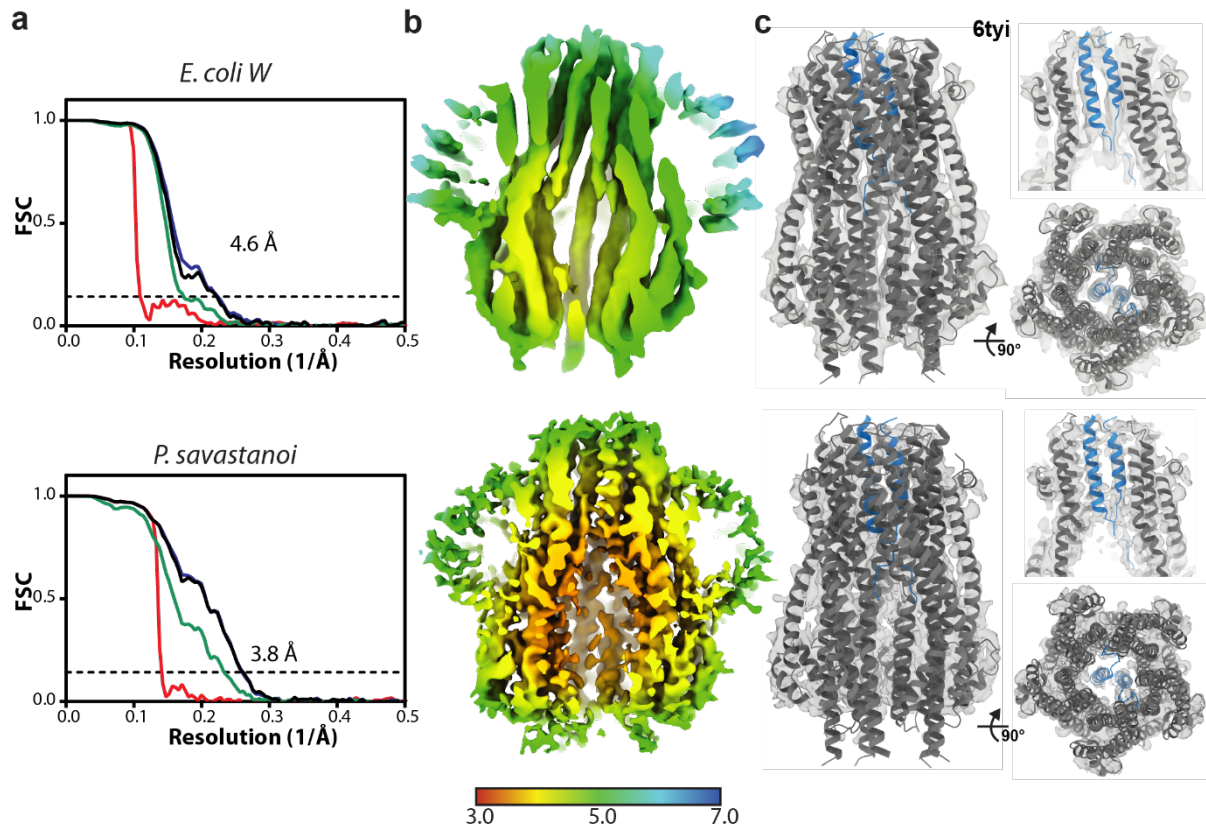

803  
804

805 **Extended Data Fig. 7. Cryo-EM map quality and resolution estimates of ExbBD complexes a,**  
806 **Gold-standard Fourier shell correlation (FSC) curves of RELION-postprocessed ExbBD maps.**  
807 **Resolution at the gold-standard cutoff (FSC = 0.143) is indicated. Curves: red, phase-**  
808 **randomized; green, unmasked; blue, masked; black, MTF-corrected. b, Local resolution**  
809 **estimates (in Å) of the sharpened maps. c, Structure of the 5:2 ExbBD complex from *E. coli*<sup>35</sup>**  
810 **(PDB 6tyi) fit into the *E. coli W* (top) and *P. savastanoi* ExbBD (bottom) maps. ExbB is coloured**  
811 **dark grey and ExbD is coloured blue. Top right panels have three ExbB subunits removed to**  
812 **demonstrate density for the two TMHs of ExbD. Bottom right panels reveal the 5:2 ExbB:ExbD**  
813 **arrangement as viewed from the cytoplasm.**

814  
815

816

817



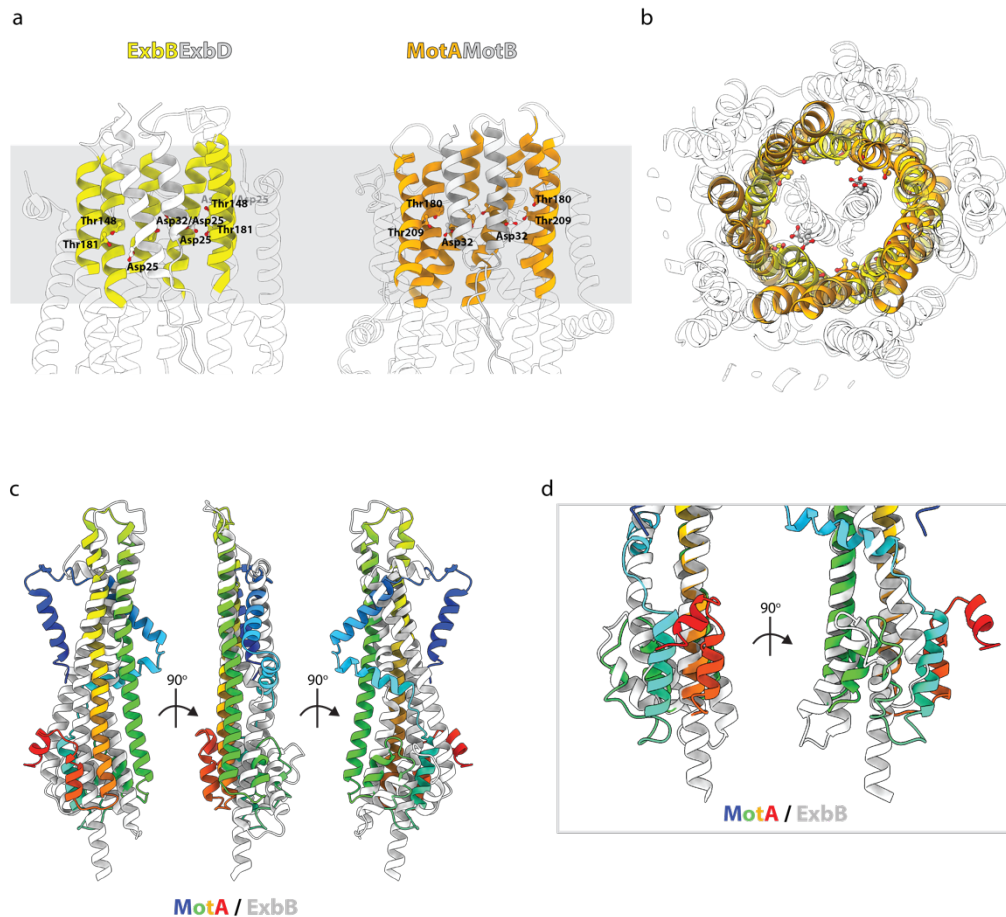

818

819 **Extended Data Fig. 8. Structural alignment of MotAB and ExbBD.**

820 **a**, side views of the cores of the *C. sporogenes* MotAB (orange) and *E. coli* ExbBD<sup>35</sup> (yellow)  
821 complexes with two front MotA/ExbB subunits removed showing the conserved Asp residues  
822 lying at the same height with respect to a ring of Thr on the MotA/ExbD components **b**,  
823 Overlaying the cores of *C. sporogenes* MotAB (orange) and *E. coli* ExbBD (yellow)  
824 of the MotA/ExbB helices demonstrates alignment of the critical polar residues between the  
825 two systems. Regions outside the core shown as transparent grey; MotB/ExbD shown in grey.  
826 **c**, Aligning a single subunit of MotA (rainbow colouring) with ExbB (white) via the pore lining  
827 helices reveals the different elaborations of this core unit in each protein. **d**, Aligning a single  
828 subunit of MotA with ExbB via the cytoplasmic extensions of the two core helices reveals the  
829 different folding of the rest of the cytoplasmic regions. Proteins coloured as in (c).

830

831

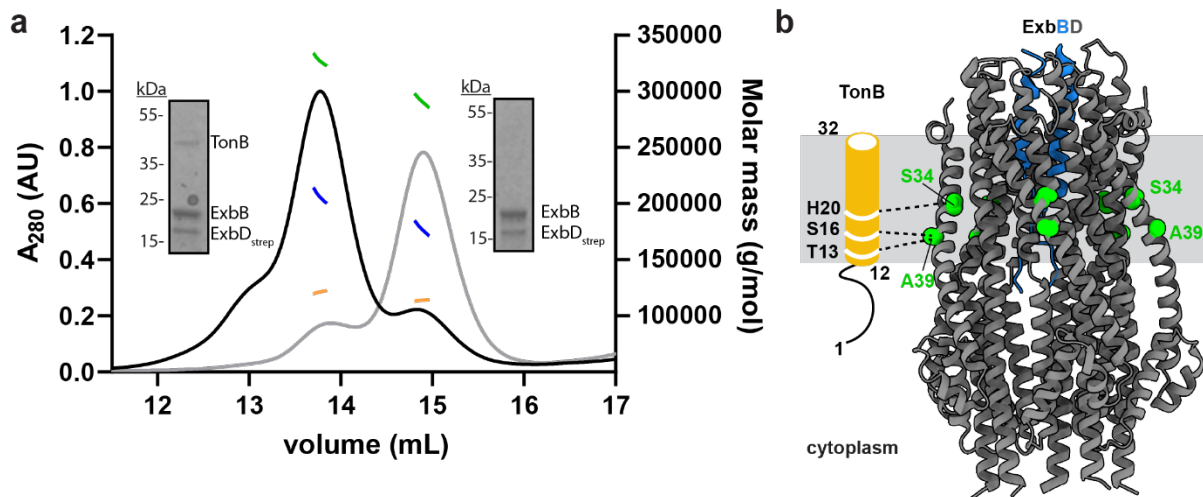

832

833

834 **Extended Data Fig. 9. TonB recruitment to the ExbBD complex.** a, SEC-MALS profile of purified *Pseudomonas* TonB-ExbBD (black absorption curve) and ExbBD (grey absorption  
835 curve) with SDS-PAGE analysis of each sample inlayed. Total protein-detergent complex molar  
836 mass (green) and deconvoluted protein (blue) and detergent (orange) molar masses are  
837 shown. A ~30 kDa difference in molar mass is observed between the complexes consistent  
838 with the the TonB-ExbBD complex containing one TonB subunit. b, Evolutionary co-variation  
839 of residues between TonB and ExbB displayed on the *E. coli* ExbBD structure<sup>35</sup> (PDB 6tyi). For  
840 clarity, a topological model of the TMH of TonB is shown in orange with TonB-ExbB contacts  
841 indicated as dashed lines. Covarying residues decorating the periphery of ExbB are displayed  
842 in green. ExbB (grey) and ExbD (blue) are displayed as ribbon cartoons. Contacts shown were  
843 generated by Gremlin<sup>5</sup> and have a probability score of > 0.9.

844

845



846 **Supplementary Data**

847 **Supplementary Table 1.** Bacterial strains and plasmids used in this study

848 **Supplementary Table 2.** Oligonucleotides used in this study.

849 **Supplementary table 3.** Species conversion of residues specified in text

850 **Supplementary Table 4.** List of evolutionary contacts predicted by Gremlin

851
